# Supplementary material for: Comprehensive DNA methylation profiling of sperm in male partners of couples with unexplained recurrent pregnancy loss
Source: Research Square preprint supplement (doi:10.21203/rs.3.rs-6835526/v1), 2025-07-02
Supplement: Supplementary file 1 [file 4d875cc81277ec536150d0c0.xlsx]

## Sheet: Table S1
Table S1 The clinical characteristics of 25 male RPL patients and 25 healthy controls.
Group	Age (y)	Height(cm)	Weight(kg)	BMI	Volume(mL)	Concentration(106/mL)	Total motility(%)	Forward motility(%)	Morphology(%)
RPL1	26	177	105	33.5153	5.7	70.29	73.68	57.09	6
RPL2	32	170	70	24.2215	3.7	44.46	62	54	3
RPL3	34	175	67	21.8776	1.5	87.93	63.75	57.61	6
RPL4	24	178	105	33.1398	5.2	29.59	49.52	45.19	2
RPL5	35	174	100	33.0295	3.8	21.66	77.37	68.25	2
RPL6	26	175	98	32	2.4	38.24	47.44	39.07	3
RPL7	33	185	90	26.2966	4	122.6	43.91	37.52	4
RPL8	28	175	56	18.2857	3.1	50.81	77.6	72.4	3
RPL9	28	175	65	21.2245	2.2	20.39	71.32	59.69	6
RPL10	27	173	65	21.7181	2.8	77.68	49.45	46.89	4
RPL11	33	174	74	24.4418	2	119.99	55.34	55.49	4
RPL12	28	169	75	26.2596	3.5	66.3	66.09	34.43	3.5
RPL13	32	180	100	30.8642	2.8	38.06	21.5	18.22	3
RPL14	27	174	68	22.46	6	140.38	72.64	62.16	4
RPL15	27	170	69	23.8754	5.6	98.88	40.65	28.42	2.5
RPL16	32	175	87	28.4082	3.2	45.73	52.89	46.67	2
RPL17	31	175	87	28.4082	3.4	80.29	70.8	60.62	7
RPL18	31	165	66	24.2424	3.7	104.34	58.18	42.73	6
RPL19	35	185	116	33.8934	2.5	54.88	47.41	40.74	2.5
RPL20	31	170	72	24.9135	4	101.02	57.75	53.52	4
RPL21	30	170	91	31.4879	4.1	50.2	48.58	44.53	2.5
RPL22	32	170	56	19.3772	3.3	124.26	80.15	70.23	1.5
RPL23	26	170	92	31.8339	3.5	81.81	42.61	38.26	2
RPL24	32	178	95	29.9836	4.2	88.21	66.94	56.45	4
RPL25	33	172	70	23.6614	2.7	86.08	80.17	72.31	4
HC1	40	170	70	24.2215	2.8	87.5	75.61	67.89	4
HC2	37	175	90	29.3878	4.3	45.94	75.66	70.35	2
HC3	37	172	70	23.6614	4	52.88	47.98	37.22	2.5
HC4	31	183	80	23.8884	4.3	62.32	70.32	57.53	4
HC5	38	170	62.5	21.6263	3.2	71.4	51	40.5	3
HC6	32	196	121	31.4973	3.1	92.13	82.24	72.59	4
HC7	27	168	70	24.8016	3.2	62.32	63.93	48.86	4.5
HC8	35	175	85	27.7551	3.8	73.51	50.65	43.55	4
HC9	35	176	75	24.2123	5.5	73.98	80.77	72.31	2
HC10	32	181	81	24.7245	5.5	75.41	59.25	52.83	3
HC11	29	178	80	25.2493	1.9	74.7	31.43	25.71	4.5
HC12	23	187	62.5	17.873	4.7	49.19	81.4	74.38	7
HC13	27	176	77	24.858	2	103.39	73.85	62.39	5
HC14	25	177	62	19.79	4.3	45.53	58.48	52.68	6
HC15	33	168	72	25.5102	3.2	97.22	54.63	39.51	4
HC16	36	181	93	28.3874	2.9	84.66	63.03	53.78	7
HC17	26	170	61	21.1073	6.5	78.49	59.21	45.92	4
HC18	32	182	85	25.6612	4.7	56.34	41.92	32.32	2
HC19	37	174	70	23.1206	5	46.75	50	43.91	2
HC20	22	175	63	20.5714	3.2	17.07	58.33	55.56	5
HC21	27	183	82	24.4857	3.1	102.08	60.45	49.13	5
HC22	26	175	75	24.4898	5.9	74.7	65.08	47.3	4.5
HC23	29	176	80	25.8264	5.2	66.59	43.58	32.47	2.5
HC24	30	180	86	26.5432	4.7	52.88	47.98	38.12	3
HC25	30	178	79	24.9337	3.5	22.37	61.21	59.35	5

## Sheet: Table S2
Table S2 A total of 960 DMPs between 5 RPL patients and 5 healthy controls by Infinium MethylationEPIC BeadChip.
probe	CHR_hg38	UCSC_RefGene_Name	UCSC_RefGene_Group	UCSC_RefGene_Name_Annovar	UCSC_RefGene_Group_Anovar	Relation_to_UCSC_CpG_Island	meth.diff	P.Value	Type
cg18379824	chr1	CASP9	5'UTR	CASP9	intronic	S_Shore	0.149664	5.34146e-06	Hypermethylated
cg04033021	chr7	LOC100996437	Body	LOC100996437	ncRNA_intronic	opensea	0.11561	3.07918e-05	Hypermethylated
cg14006650	chr10	PFKP	Body	PFKP	intronic	N_Shore	-0.245181	3.39404e-05	Hypomethylated
cg10615369	chr18		IGR	CABLES1(dist=14947),TMEM241(dist=20598)	intergenic	opensea	0.168417	3.69242e-05	Hypermethylated
cg10429523	chr6	STL	Body	RNF217-AS1	ncRNA_intronic	opensea	0.191645	5.03058e-05	Hypermethylated
cg08584798	chr8		IGR	LINC01419(dist=142024),RALYL(dist=631866)	intergenic	opensea	0.211102	7.96117e-05	Hypermethylated
cg22041454	chr3		IGR	NAALADL2(dist=258356),MIR7977(dist=446199)	intergenic	opensea	0.173703	0.000102295	Hypermethylated
cg25707945	chr10	PFKP	Body	PFKP	splicing	N_Shore	-0.226258	0.000131956	Hypomethylated
cg20367065	chr3	OR5H6	1stExon	OR5H6	exonic	opensea	0.211417	0.000156155	Hypermethylated
cg14753599	chr10	C10orf116	1stExon	ADIRF	exonic	Island	0.13435	0.00018303	Hypermethylated
cg01110291	chr22		IGR	FAM230G	ncRNA_intronic	opensea	0.209987	0.00018719	Hypermethylated
cg04501757	chr1		IGR	LINC01677	ncRNA_intronic	opensea	0.123411	0.000198882	Hypermethylated
cg20810675	chr4		IGR	LINC01612(dist=399315),LINC02382(dist=59432)	intergenic	opensea	0.255178	0.000205046	Hypermethylated
cg02671791	chr3		IGR	LOC101927829(dist=939863),VENTXP7(dist=114935)	intergenic	opensea	0.236183	0.000228501	Hypermethylated
cg14145972	chr7		IGR	C7orf66(dist=714356),EIF3IP1(dist=360284)	intergenic	opensea	0.136425	0.000253975	Hypermethylated
cg02777461	chr13	LINC00376	Body	LINC00376	ncRNA_intronic	opensea	0.184934	0.000292693	Hypermethylated
cg09456254	chr21	C21orf130	TSS1500	LINC00323(dist=374)	upstream	opensea	0.137081	0.000299435	Hypermethylated
cg07586374	chr4	LINC01182	Body	LINC01182	ncRNA_intronic	opensea	0.228356	0.000306458	Hypermethylated
cg24528463	chr6		IGR	LINC01615(dist=10666),LINC02544(dist=1649)	intergenic	opensea	0.236861	0.000307348	Hypermethylated
cg08775122	chr22		IGR	ISX-AS1	ncRNA_intronic	opensea	0.126938	0.000332151	Hypermethylated
cg06079632	chr6		IGR	GJA1(dist=178263),HSF2(dist=771560)	intergenic	opensea	0.142959	0.000421259	Hypermethylated
cg26693553	chr10	PFKP	Body	PFKP	UTR5	N_Shore	-0.127488	0.000438165	Hypomethylated
cg06225621	chr1		IGR	LINC01031(dist=1168805),LINC01724(dist=1510122)	intergenic	opensea	-0.137627	0.00044818	Hypomethylated
cg24741767	chr3		IGR	HTR1F	intronic	opensea	0.271377	0.00051014	Hypermethylated
cg18042632	chr21	C21orf130	TSS1500	LINC00323(dist=911)	upstream	opensea	0.121192	0.000515103	Hypermethylated
cg08811336	chr10	PFKP	Body	PFKP	intronic	N_Shore	-0.496657	0.000545228	Hypomethylated
cg16504439	chr4		IGR	SLIT2(dist=25061),NONE(dist=NONE)	intergenic	opensea	0.173212	0.000608971	Hypermethylated
cg01190842	chr13		IGR	LINC01049(dist=303615),LINC00410(dist=51998)	intergenic	opensea	0.155804	0.000610487	Hypermethylated
cg16156543	chr6		IGR	LINC01615(dist=11030),LINC02544(dist=1285)	intergenic	opensea	0.222193	0.000651924	Hypermethylated
cg27231292	chr6		IGR	TFAP2D(dist=25100),TFAP2B(dist=20738)	intergenic	opensea	0.310871	0.000654632	Hypermethylated
cg14309307	chr6	PREP	Body	PREP	intronic	opensea	0.175986	0.00066579	Hypermethylated
cg14981650	chr9	MLLT3	Body	MLLT3	intronic	opensea	0.164145	0.000668273	Hypermethylated
cg07093966	chr3		IGR	HTR1F	intronic	opensea	0.201437	0.000675651	Hypermethylated
cg09118904	chr5		IGR	FBN2(dist=124509),SLC27A6(dist=302373)	intergenic	opensea	0.151013	0.000722277	Hypermethylated
cg22481115	chr3		IGR	MIR548AB(dist=913224),ALCAM(dist=929373)	intergenic	opensea	0.172791	0.000723824	Hypermethylated
cg13503915	chr19	SIGLEC5	TSS1500	SIGLEC5(dist=500)	upstream	opensea	0.26907	0.000727311	Hypermethylated
cg21708439	chr12		IGR	KRT19P2(dist=109343),NDUFA12(dist=26957)	intergenic	opensea	0.106138	0.000743364	Hypermethylated
cg24440441	chr18		IGR	CD226	UTR3	opensea	0.102739	0.000794927	Hypermethylated
cg10372520	chr4		IGR	LINC02428(dist=119915),TACR3(dist=26390)	intergenic	opensea	0.204079	0.000824217	Hypermethylated
cg01517514	chr12		IGR	RMST(dist=121835),LOC643711(dist=26562)	intergenic	opensea	0.116212	0.00084282	Hypermethylated
cg02703563	chr10		IGR	LINC01375(dist=135731),LINC02653(dist=309417)	intergenic	opensea	0.241201	0.000895086	Hypermethylated
cg08579192	chr4	SPATA5	Body	SPATA5	intronic	opensea	0.137842	0.00089577	Hypermethylated
cg24260931	chr10	PFKP	Body	PFKP	intronic	N_Shore	-0.434473	0.000901776	Hypomethylated
cg11306934	chr21		IGR	MIR99AHG(dist=514957),LINC01549(dist=292205)	intergenic	opensea	0.121449	0.000913834	Hypermethylated
cg22450531	chr13		IGR	CYSLTR2(dist=20179),FNDC3A(dist=244508)	intergenic	opensea	0.134664	0.000917659	Hypermethylated
cg01427108	chr3	LTF	Body	LTF	intronic	opensea	-0.228251	0.000938919	Hypomethylated
cg23280259	chr3		IGR	LOC101927829(dist=1038403),VENTXP7(dist=16395)	intergenic	opensea	0.106962	0.000942307	Hypermethylated
cg09333063	chr3	LINC00620	Body	LINC00620	ncRNA_intronic	opensea	0.111879	0.00096	Hypermethylated
cg17894189	chr20		IGR	GPCPD1(dist=63530),SHLD1(dist=75851)	intergenic	opensea	-0.326607	0.00100002	Hypomethylated
cg18362496	chr11	H19	TSS1500	H19	ncRNA_intronic	S_Shore	0.132047	0.0010141	Hypermethylated
cg23203595	chr3		IGR	SIAH2(dist=88340),MINDY4B(dist=18867)	intergenic	opensea	0.129644	0.00101938	Hypermethylated
cg15988983	chr12		IGR	METTL25(dist=180213),TMTC2(dist=27456)	intergenic	opensea	-0.137721	0.00106751	Hypomethylated
cg07418124	chr10	PFKP	Body	PFKP	intronic	N_Shore	-0.167176	0.00108949	Hypomethylated
cg04682830	chr11		IGR	TCN1(dist=44880),OOSP1(dist=31512)	intergenic	opensea	0.139979	0.00111578	Hypermethylated
cg07009371	chr5		IGR	SLC25A46(dist=25735),TSLP(dist=280820)	intergenic	opensea	0.201768	0.00111889	Hypermethylated
cg06701353	chr6	LY86	Body	LY86-AS1	ncRNA_intronic	opensea	0.121664	0.00113449	Hypermethylated
cg10144272	chr13	LINC00376	ExonBnd	LINC00376	ncRNA_exonic	opensea	0.125232	0.00119043	Hypermethylated
cg07255956	chr9		IGR	LINC01243(dist=779911),ACO1(dist=223202)	intergenic	opensea	0.173874	0.00119089	Hypermethylated
cg13323113	chr6	LY86	Body	LY86-AS1	ncRNA_intronic	opensea	0.144414	0.00119787	Hypermethylated
cg19706046	chr5	SCGB3A2	TSS1500	SCGB3A2(dist=797)	upstream	opensea	0.130442	0.00120071	Hypermethylated
cg09561200	chr19	KLHL26	3'UTR	KLHL26	UTR3	S_Shore	0.10417	0.00121101	Hypermethylated
cg13999795	chr8		IGR	LINC00824(dist=54508),LINC00976(dist=333692)	intergenic	opensea	0.143222	0.00121202	Hypermethylated
cg21882039	chr7	LOC101928254	TSS1500	LOC101928283	ncRNA_intronic	opensea	0.126205	0.00126634	Hypermethylated
cg18322516	chr20	PROKR2	Body	PROKR2	exonic	Island	0.140834	0.00129941	Hypermethylated
cg01680303	chr11		IGR	LINC02711(dist=346108),RAB38(dist=70008)	intergenic	opensea	0.170948	0.00134378	Hypermethylated
cg26395382	chr10	C10orf116	5'UTR	ADIRF(dist=4)	upstream	Island	0.176243	0.00137568	Hypermethylated
cg11478345	chr5		IGR	LOC102467226(dist=74457),FTMT(dist=451588)	intergenic	opensea	0.154206	0.00138267	Hypermethylated
cg25825391	chr3	OR5H6	TSS1500	OR5H6(dist=258)	upstream	opensea	0.228463	0.00138745	Hypermethylated
cg03582371	chr17	TBC1D16	Body	TBC1D16	intronic	N_Shore	0.119543	0.001404	Hypermethylated
cg04134460	chr7		IGR	LRGUK(dist=19314),SLC35B4(dist=5423)	intergenic	opensea	0.165318	0.0014076	Hypermethylated
cg18144470	chr2		IGR	DIRC3(dist=28967),TNS1(dist=14029)	intergenic	opensea	-0.100777	0.00141308	Hypomethylated
cg08829090	chr12		IGR	LOC101928441(dist=312745),SOX5(dist=25172)	intergenic	opensea	0.109529	0.00142865	Hypermethylated
cg24370295	chr17		IGR	LINC01979(dist=2456),TBC1D16(dist=3162)	intergenic	N_Shore	0.150778	0.00150943	Hypermethylated
cg01094495	chr5		IGR	RIOK2(dist=114082),LINC01340(dist=207367)	intergenic	opensea	0.24762	0.00152911	Hypermethylated
cg13102069	chr18		IGR	LINC02582(dist=425832),FBXO15(dist=297647)	intergenic	opensea	0.18634	0.00154363	Hypermethylated
cg05491773	chr8	NECAB1	Body	NECAB1	intronic	opensea	0.101495	0.00157339	Hypermethylated
cg22444562	chr2	GPR1-AS	Body	GPR1-AS	ncRNA_intronic	opensea	0.523148	0.00158415	Hypermethylated
cg02642958	chr8		IGR	ADCY8(dist=276691),EFR3A(dist=586494)	intergenic	opensea	0.1524	0.00158664	Hypermethylated
cg05247035	chr8		IGR	EYA1(dist=136022),MSC(dist=157426)	intergenic	opensea	0.205726	0.0016071	Hypermethylated
cg13262078	chr19		IGR	PLVAP(dist=17116),BST2(dist=8481)	intergenic	S_Shore	0.160682	0.00161722	Hypermethylated
cg10252647	chr7		IGR	ZNF479(dist=6716),GUSBP10(dist=19090)	intergenic	opensea	0.117342	0.00167216	Hypermethylated
cg02851625	chr8		IGR	LOC102724874(dist=675656),PKIA(dist=364352)	intergenic	opensea	0.172501	0.00171257	Hypermethylated
cg11180750	chr12	SLCO1B1	TSS1500	SLCO1B3-SLCO1B7(dist=38857),SLCO1B1(dist=1115)	intergenic	opensea	0.231913	0.00183918	Hypermethylated
cg04678336	chr13	SGCG	Body	SGCG	exonic	opensea	0.155065	0.00187674	Hypermethylated
cg15568107	chr11	GLYAT	3'UTR	GLYAT	UTR3	opensea	0.233318	0.00188402	Hypermethylated
cg07380549	chr3	THRB	Body	THRB	intronic	opensea	0.284533	0.00192343	Hypermethylated
cg11735853	chr11	H19	TSS1500	H19	ncRNA_intronic	Island	0.112053	0.00193417	Hypermethylated
cg00925947	chr4		IGR	PCDH10(dist=816973),PABPC4L(dist=184660)	intergenic	opensea	0.123262	0.00195531	Hypermethylated
cg26990023	chr6	SMOC2	Body	SMOC2	intronic	N_Shore	0.140143	0.00202422	Hypermethylated
cg18602114	chr10	C10orf116	Body	ADIRF	intronic	Island	0.179153	0.0020631	Hypermethylated
cg06012173	chr22		IGR	AP1B1(dist=36026),RFPL1S(dist=12406)	intergenic	opensea	-0.186838	0.00207823	Hypomethylated
cg12012426	chr4	KIAA1530	Body	UVSSA	intronic	Island	-0.555463	0.00209148	Hypomethylated
cg07047439	chr22		IGR	LOC284930(dist=94697),MIR3201(dist=324130)	intergenic	opensea	0.121396	0.00219781	Hypermethylated
cg00954162	chr20	CFAP61	Body	CFAP61	intronic	opensea	0.160253	0.00221736	Hypermethylated
cg23468045	chr5		IGR	LINC01194	ncRNA_intronic	opensea	0.119312	0.0022687	Hypermethylated
cg15955935	chr22	CELSR1	Body	CELSR1	intronic	S_Shelf	0.102681	0.00229227	Hypermethylated
cg10421587	chr8		IGR	LOC102724874(dist=675335),PKIA(dist=364673)	intergenic	opensea	0.113669	0.00230752	Hypermethylated
cg13120258	chr17	NXN	Body	NXN	intronic	opensea	-0.35612	0.00231479	Hypomethylated
cg14895968	chr7		IGR	ANKRD7(dist=1329621),LINC02476(dist=47079)	intergenic	opensea	0.134083	0.0023247	Hypermethylated
cg24929418	chr1		IGR	LINC01677	ncRNA_intronic	opensea	0.180358	0.00233025	Hypermethylated
cg06466757	chr4		IGR	CTBP1-DT(dist=9013),MAEA(dist=27871)	intergenic	opensea	0.194848	0.00233646	Hypermethylated
cg22969397	chr22	CELSR1	Body	CELSR1	intronic	S_Shelf	0.177654	0.00242155	Hypermethylated
cg01479210	chr10		IGR	IFIT3(dist=8949),IFIT1B(dist=28139)	intergenic	opensea	0.241735	0.00244647	Hypermethylated
cg18335663	chr3	OR5H6	TSS1500	OR5H6(dist=657)	upstream	opensea	0.152294	0.0024644	Hypermethylated
cg08998189	chr11	GLYAT	Body	GLYAT	exonic	opensea	0.207144	0.00246485	Hypermethylated
cg02548407	chr17		IGR	LINC01979(dist=2432),TBC1D16(dist=3186)	intergenic	N_Shore	0.168384	0.00249344	Hypermethylated
cg11686436	chr19	FAM83E	Body	FAM83E	intronic	N_Shore	0.166076	0.00259489	Hypermethylated
cg08854799	chr19	FAM83E	Body	FAM83E	exonic	Island	0.193777	0.00266441	Hypermethylated
cg12378790	chr3		IGR	LOC101927829(dist=923743),VENTXP7(dist=131055)	intergenic	opensea	0.265336	0.0026738	Hypermethylated
cg05255268	chr5		IGR	HCN1(dist=28421),NONE(dist=NONE)	intergenic	opensea	0.248617	0.0027032	Hypermethylated
cg06232075	chr4		IGR	CTBP1-DT(dist=9387),MAEA(dist=27497)	intergenic	opensea	0.21268	0.00273666	Hypermethylated
cg18902440	chr6	HLA-DQB1	Body	HLA-DQB1	intronic	N_Shore	0.120156	0.0027769	Hypermethylated
cg26367013	chr14		IGR	LINC02287(dist=12143),CHGA(dist=3525)	intergenic	N_Shelf	0.111781	0.00279301	Hypermethylated
cg00693915	chr1		IGR	PNRC2,SRSF10(dist=738)	downstream	S_Shelf	-0.125484	0.00279984	Hypomethylated
cg00399441	chr13	SGCG	3'UTR	SGCG	UTR3	opensea	0.139666	0.00282194	Hypermethylated
cg18434660	chr19	ERVV-2	TSS200	ERVV-2(dist=65)	upstream	opensea	0.35205	0.00282998	Hypermethylated
cg24587349	chr3		IGR	LINC01192(dist=611001),MIR1263(dist=257169)	intergenic	opensea	0.104207	0.00295157	Hypermethylated
cg19874327	chr4	UGT2A2	Body	UGT2A1,UGT2A2	intronic	opensea	0.103266	0.00296473	Hypermethylated
cg13731818	chr3		IGR	LINC01487(dist=27014),STRIT1(dist=20090)	intergenic	opensea	0.210025	0.00298706	Hypermethylated
cg26106055	chr4	SCFD2	Body	SCFD2	intronic	opensea	0.148815	0.00303069	Hypermethylated
cg20387860	chr11		IGR	EHF(dist=142752),APIP(dist=76257)	intergenic	opensea	0.190364	0.00305563	Hypermethylated
cg01471167	chr2	PQLC3	Body	SLC66A3	intronic	opensea	0.104299	0.00308135	Hypermethylated
cg16636612	chr19	FAM83E	Body	FAM83E	exonic	Island	0.210617	0.00313737	Hypermethylated
cg05962169	chr6	TXLNB	Body	TXLNB	intronic	opensea	0.44457	0.0032125	Hypermethylated
cg27198040	chr12		IGR	CCDC91(dist=209246),FAR2(dist=389866)	intergenic	opensea	0.149532	0.00327315	Hypermethylated
cg11183401	chr20	CFAP61	Body	CFAP61	intronic	opensea	0.135206	0.00334103	Hypermethylated
cg06394109	chr16		IGR	C1QTNF8(dist=6267),CACNA1H(dist=50595)	intergenic	Island	0.444322	0.00337165	Hypermethylated
cg01856383	chr8		IGR	LINC01288(dist=37428),UNC5D(dist=333249)	intergenic	opensea	0.102075	0.00340576	Hypermethylated
cg25004108	chr8		IGR	LINC02605(dist=448225),MIR12123(dist=43441)	intergenic	opensea	0.110386	0.00341744	Hypermethylated
cg19491420	chr4		IGR	KIAA0232(dist=5016),TBC1D14(dist=20256)	intergenic	opensea	0.122754	0.00344926	Hypermethylated
cg09312897	chr6	HLA-DQB1	Body	HLA-DQB1	intronic	N_Shore	0.283116	0.00347637	Hypermethylated
cg19301859	chr13	LINC00367	TSS200	LINC00367(dist=12)	upstream	S_Shelf	0.132437	0.00352663	Hypermethylated
cg17048103	chr2	CCDC141	1stExon	CCDC141	exonic	opensea	0.149687	0.00353114	Hypermethylated
cg07419795	chr4		IGR	NONE(dist=NONE),SLIT2(dist=58161)	intergenic	opensea	0.164681	0.00353888	Hypermethylated
cg07357445	chr5	XRCC4	Body	XRCC4	intronic	opensea	-0.11549	0.00355369	Hypomethylated
cg22801075	chr3		IGR	ACP3(dist=28186),DNAJC13(dist=21014)	intergenic	opensea	-0.158552	0.0035836	Hypomethylated
cg14241894	chr2	SH3BP4	5'UTR	SH3BP4	intronic	opensea	0.132691	0.00359359	Hypermethylated
cg11368679	chr4		IGR	NONE(dist=NONE),SLIT2(dist=58704)	intergenic	opensea	0.138682	0.0036011	Hypermethylated
cg18679830	chr12		IGR	SYT10(dist=483880),ALG10(dist=98797)	intergenic	opensea	0.121618	0.00366498	Hypermethylated
cg02878385	chr10		IGR	LINC01375(dist=141071),LINC02653(dist=304077)	intergenic	opensea	0.174988	0.00373434	Hypermethylated
cg16308962	chr3	TPRG1-AS2	TSS1500	TPRG1	intronic	opensea	0.103273	0.00374618	Hypermethylated
cg02499308	chr2	ACMSD	TSS1500	TMEM163(dist=118210),ACMSD(dist=1406)	intergenic	opensea	0.10434	0.00378625	Hypermethylated
cg09573585	chr10	C10orf116	TSS200	ADIRF(dist=111)	upstream	Island	0.160304	0.00379396	Hypermethylated
cg24099155	chr1	SLC44A5	Body	SLC44A5	intronic	opensea	0.102573	0.00384967	Hypermethylated
cg13643966	chr4	SPATA5	Body	SPATA5	intronic	opensea	0.188254	0.00390025	Hypermethylated
cg04796511	chr3		IGR	NPHP3-AS1(dist=14867),TMEM108(dist=149210)	intergenic	opensea	0.24477	0.00395295	Hypermethylated
cg12314682	chr17	TBC1D16	Body	TBC1D16	intronic	S_Shore	0.126286	0.00400804	Hypermethylated
cg14412596	chr6		IGR	BCKDHB(dist=197885),TENT5A(dist=1201575)	intergenic	opensea	0.150291	0.00425866	Hypermethylated
cg16021551	chr5		IGR	CTNND2(dist=427089),LINC01194(dist=243322)	intergenic	opensea	0.126397	0.0043075	Hypermethylated
cg09263768	chr7		IGR	LRGUK(dist=19611),SLC35B4(dist=5126)	intergenic	opensea	0.1049	0.00434932	Hypermethylated
cg26523866	chr1		IGR	NONE(dist=NONE),BRINP3(dist=344686)	intergenic	opensea	0.112806	0.00434996	Hypermethylated
cg03680348	chr6		IGR	SMOC2(dist=17669),LOC105378146(dist=241495)	intergenic	opensea	0.104231	0.00435539	Hypermethylated
cg01480205	chr4		IGR	CTBP1-DT(dist=9418),MAEA(dist=27466)	intergenic	opensea	0.234544	0.00435881	Hypermethylated
cg13434764	chr9		IGR	MIR1268A	ncRNA_intronic	S_Shore	0.12182	0.00439312	Hypermethylated
cg03150676	chr4	LOC101929194	Body	LNCPRESS2	ncRNA_intronic	opensea	0.106658	0.00440769	Hypermethylated
cg11209878	chr17	TBC1D16	Body	TBC1D16	intronic	S_Shore	0.201598	0.00453506	Hypermethylated
cg25795290	chr10		IGR	HSPA12A	intronic	opensea	0.10816	0.00455312	Hypermethylated
cg14027204	chr1	PTGFRN	Body	PTGFRN	exonic	opensea	0.126193	0.00462687	Hypermethylated
cg01691328	chr7		IGR	LOC101928283(dist=537759),GRM8(dist=521518)	intergenic	opensea	0.17801	0.00484212	Hypermethylated
cg18347762	chr13		IGR	LINC01049(dist=311972),LINC00410(dist=43641)	intergenic	opensea	0.249029	0.00487315	Hypermethylated
cg18658151	chr17	TBC1D16	Body	TBC1D16	intronic	S_Shore	0.192043	0.0048972	Hypermethylated
cg01028140	chr2	TPO	Body	TPO	intronic	N_Shelf	0.119524	0.0049053	Hypermethylated
cg08698139	chr21		IGR	MIR99AHG(dist=281600),LINC01549(dist=525562)	intergenic	opensea	0.140038	0.0049102	Hypermethylated
cg22945556	chr19	FAM83E	Body	FAM83E	exonic	Island	0.143484	0.00492044	Hypermethylated
cg19408572	chr4	DGKQ	5'UTR	DGKQ	UTR5	Island	-0.103653	0.00502735	Hypomethylated
cg18810376	chr13	MTUS2	Body	MTUS2	intronic	Island	0.128288	0.00503683	Hypermethylated
cg27157434	chr1	PTGFRN	3'UTR	PTGFRN	UTR3	opensea	0.145536	0.00505088	Hypermethylated
cg14946811	chr19	SLC5A5	TSS1500	RPL18A(dist=7564),SLC5A5(dist=1062)	intergenic	N_Shore	0.111077	0.00506028	Hypermethylated
cg01303141	chr17	TBC1D16	Body	TBC1D16	intronic	Island	0.139096	0.00511207	Hypermethylated
cg11708721	chr1	PTGFRN	3'UTR	PTGFRN	UTR3	opensea	0.112995	0.00514723	Hypermethylated
cg04322064	chr20	CFAP61	Body	CFAP61	intronic	opensea	0.207187	0.00515257	Hypermethylated
cg09217350	chr6		IGR	LOC101928516	ncRNA_intronic	opensea	0.222828	0.00516833	Hypermethylated
cg14350544	chr9	FBP2	Body	FBP2	intronic	opensea	-0.118628	0.0051716	Hypomethylated
cg18630337	chr4		IGR	ADAMTS3(dist=340853),COX18(dist=142288)	intergenic	opensea	0.156345	0.00517928	Hypermethylated
cg06412045	chr5		IGR	RIOK2(dist=114015),LINC01340(dist=207434)	intergenic	opensea	0.184889	0.00525303	Hypermethylated
cg05424932	chr10		IGR	LINC00707(dist=144842),SFMBT2(dist=170876)	intergenic	opensea	0.203038	0.00526852	Hypermethylated
cg17553495	chr5		IGR	LINC02224(dist=64772),MRPS30-DT(dist=169274)	intergenic	opensea	0.165927	0.00526895	Hypermethylated
cg04600867	chr4	STK32B	Body	STK32B	intronic	opensea	0.103882	0.00527334	Hypermethylated
cg11813949	chr11	PRR5L	5'UTR	PRR5L	intronic	opensea	-0.116762	0.00528474	Hypomethylated
cg13856990	chr5		IGR	SLC25A46(dist=20409),TSLP(dist=286146)	intergenic	opensea	0.205286	0.00530872	Hypermethylated
cg09644422	chr1		IGR	ADGRL4(dist=1106808),LINC01781(dist=422217)	intergenic	opensea	0.183962	0.00541347	Hypermethylated
cg09909523	chr6	CNKSR3	Body	CNKSR3	exonic	opensea	0.124762	0.00545392	Hypermethylated
cg11836884	chr10		IGR	PROSER2-AS1	ncRNA_intronic	N_Shore	0.131665	0.00567539	Hypermethylated
cg16276021	chr3		IGR	DCBLD2(dist=394538),COL8A1(dist=342361)	intergenic	opensea	0.213201	0.0056858	Hypermethylated
cg18256897	chr1	ST6GALNAC5	Body	ST6GALNAC5	intronic	opensea	0.117893	0.00576337	Hypermethylated
cg14730704	chr4		IGR	UCHL1(dist=44002),LIMCH1(dist=47150)	intergenic	opensea	0.139343	0.00578044	Hypermethylated
cg27478479	chr7	LOC101928254	TSS1500	LOC101928283	ncRNA_intronic	opensea	0.123749	0.00580662	Hypermethylated
cg15834251	chr17	NXN	TSS200	NXN	intronic	opensea	-0.389446	0.00582244	Hypomethylated
cg12478829	chr13		IGR	MIR5007(dist=401963),PRR20B(dist=1564406)	intergenic	opensea	0.136147	0.00589551	Hypermethylated
cg17187673	chr4	STK32B	Body	STK32B	intronic	opensea	0.158417	0.00596054	Hypermethylated
cg08977827	chr10		IGR	AKR1C4(dist=43000),LINC02561(dist=4040)	intergenic	opensea	0.125482	0.00596383	Hypermethylated
cg14515779	chr1		IGR	LINC01349(dist=11406),VCAM1(dist=61230)	intergenic	opensea	0.11	0.00600479	Hypermethylated
cg05345062	chr11		IGR	MIR8068(dist=316163),LINC02546(dist=800702)	intergenic	opensea	0.14395	0.0060669	Hypermethylated
cg01879365	chr3	TPRG1-AS2	TSS1500	TPRG1	intronic	opensea	0.13677	0.00614534	Hypermethylated
cg27300742	chr11	H19	TSS1500	H19	ncRNA_intronic	S_Shore	0.113432	0.0061547	Hypermethylated
cg05776160	chr4		IGR	GBA3(dist=913658),PPARGC1A(dist=58791)	intergenic	opensea	0.175602	0.0061781	Hypermethylated
cg07506081	chr17	TBC1D16	Body	TBC1D16	intronic	Island	0.153421	0.00622124	Hypermethylated
cg09949687	chr11	KDM4D	Body	KDM4D	exonic	opensea	0.114731	0.00622776	Hypermethylated
cg14742970	chr11	KDM4D	Body	KDM4D	exonic	opensea	0.126101	0.00623189	Hypermethylated
cg15205546	chr3		IGR	LOC101927829(dist=923748),VENTXP7(dist=131050)	intergenic	opensea	0.149386	0.00623421	Hypermethylated
cg17200999	chr4	SYNPO2	Body	SYNPO2	intronic	opensea	-0.11128	0.00625207	Hypomethylated
cg21274723	chr11		IGR	EHF(dist=157791),APIP(dist=61218)	intergenic	opensea	0.137036	0.00644302	Hypermethylated
cg24605090	chr11	H19	TSS1500	H19	ncRNA_intronic	S_Shore	0.118751	0.00645606	Hypermethylated
cg02829413	chr5		IGR	LINC02240(dist=160685),LINC02039(dist=416665)	intergenic	opensea	0.109969	0.00647484	Hypermethylated
cg18909235	chr17	C17orf28	Body	HID1	intronic	opensea	0.105074	0.00659081	Hypermethylated
cg26019793	chr4		IGR	MIR12113(dist=18622),LINC02270(dist=421581)	intergenic	opensea	0.147688	0.00659126	Hypermethylated
cg20780944	chr8	ERICH1	Body	ERICH1	intronic	S_Shore	0.150181	0.00660529	Hypermethylated
cg27413539	chr10		IGR	MGMT(dist=6849),EBF3(dist=57401)	intergenic	N_Shore	0.165652	0.00669665	Hypermethylated
cg25664234	chr18		IGR	CDH2(dist=1184552),MIR302F(dist=937230)	intergenic	opensea	-0.167824	0.00677835	Hypomethylated
cg04781580	chr14		IGR	OR4E1(dist=253341),LOC105370401(dist=455235)	intergenic	opensea	-0.262425	0.00680398	Hypomethylated
cg25475843	chr3		IGR	MTHFD2P1(dist=54885),MIR8060(dist=621886)	intergenic	opensea	0.125752	0.00687006	Hypermethylated
cg08046926	chr4		IGR	LINC02429(dist=29459),MIR548AG1(dist=1846201)	intergenic	opensea	0.14044	0.00691649	Hypermethylated
cg01539474	chr11	H19	TSS1500	H19	ncRNA_intronic	Island	0.127388	0.00700842	Hypermethylated
cg00098577	chr11		IGR	TCN1(dist=52124),OOSP1(dist=24268)	intergenic	opensea	0.210798	0.00703849	Hypermethylated
cg21498620	chr14	KIAA1409	Body	UNC79	exonic	opensea	0.137272	0.00709999	Hypermethylated
cg26668906	chr6		IGR	SMOC2(dist=17600),LOC105378146(dist=241564)	intergenic	opensea	0.111157	0.00720582	Hypermethylated
cg12772314	chr18		IGR	LOC284241	ncRNA_intronic	S_Shore	-0.200892	0.00724008	Hypomethylated
cg04808130	chr15	FBN1	Body	FBN1	intronic	opensea	0.112058	0.00725806	Hypermethylated
cg17443753	chr1		IGR	AJAP1(dist=327475),MIR4689(dist=742675)	intergenic	opensea	0.170346	0.00730469	Hypermethylated
cg17978015	chr4		IGR	LINC01085(dist=29588),LINC00504(dist=300826)	intergenic	opensea	0.149034	0.00732059	Hypermethylated
cg27430444	chr2		IGR	PCGEM1(dist=1313017),LINC01821(dist=254351)	intergenic	opensea	-0.109481	0.0073625	Hypomethylated
cg24335070	chr2		IGR	CCDC141	UTR5	opensea	0.101889	0.00738282	Hypermethylated
cg20573702	chr12	OR6C6	TSS1500	OR6C6(dist=1124),OR6C1(dist=24244)	intergenic	opensea	0.162764	0.00745824	Hypermethylated
cg02683935	chr17	TBC1D16	Body	TBC1D16	intronic	S_Shore	0.118378	0.00746874	Hypermethylated
cg14525935	chr7	C7orf50	Body	C7orf50	intronic	Island	0.173334	0.00747308	Hypermethylated
cg12395784	chr19	JSRP1	TSS200	JSRP1(dist=96)	upstream	S_Shelf	0.142866	0.00748277	Hypermethylated
cg10696282	chr6	CPNE5	Body	CPNE5	intronic	opensea	-0.155172	0.00751321	Hypomethylated
cg26594796	chr4	CWH43	Body	CWH43	exonic	opensea	0.124557	0.00751831	Hypermethylated
cg07778935	chr12		IGR	SYT10(dist=483690),ALG10(dist=98987)	intergenic	opensea	0.225634	0.00756888	Hypermethylated
cg14787267	chr17	TBC1D16	Body	TBC1D16	intronic	Island	0.127571	0.00764784	Hypermethylated
cg14798721	chr6		IGR	MAP3K7(dist=711011),MIR4643(dist=223576)	intergenic	opensea	0.115809	0.00773532	Hypermethylated
cg05831287	chr6		IGR	HDAC2-AS2(dist=676057),LINC02534(dist=616756)	intergenic	opensea	0.109874	0.00782988	Hypermethylated
cg14197801	chr19	JSRP1	TSS200	JSRP1(dist=76)	upstream	S_Shelf	0.110102	0.00783619	Hypermethylated
cg21702557	chr12		IGR	LINC02414(dist=20)	upstream	opensea	0.10073	0.00790248	Hypermethylated
cg11882563	chr14		IGR	LINC00609	ncRNA_intronic	opensea	0.180046	0.00790636	Hypermethylated
cg10829061	chr11		IGR	MPEG1(dist=89167),OR5AN1(dist=62365)	intergenic	opensea	0.155109	0.00797665	Hypermethylated
cg24477102	chr8	CSMD1	Body	CSMD1	intronic	Island	0.150922	0.00799719	Hypermethylated
cg14162021	chr2		IGR	LOC101927967(dist=250537),LOC105374820(dist=4263)	intergenic	opensea	-0.135229	0.0080076	Hypomethylated
cg17424002	chr5		IGR	LINC01338(dist=79805),TMEM167A(dist=113205)	intergenic	opensea	0.105581	0.00803246	Hypermethylated
cg21680227	chr10	AKR1C3	TSS1500	AKR1C3	intronic	opensea	0.106958	0.00806868	Hypermethylated
cg07502423	chr19	ERVV-2	1stExon	ERVV-2	UTR5	opensea	0.208476	0.00809818	Hypermethylated
cg24292351	chr19	INSL3	TSS200	INSL3(dist=13)	upstream	Island	0.111058	0.00817215	Hypermethylated
cg27009550	chr22	ASPHD2	Body	ASPHD2	exonic	Island	0.166528	0.008214	Hypermethylated
cg17660245	chr19	NUMBL	Body	NUMBL	intronic	Island	0.104546	0.00841949	Hypermethylated
cg10405729	chr11	GLYAT	Body	GLYAT	intronic	opensea	0.213277	0.00842456	Hypermethylated
cg18955208	chr6	CASC15	Body	CASC15	ncRNA_intronic	opensea	-0.106901	0.00846204	Hypomethylated
cg21694330	chr3		IGR	MTHFD2P1(dist=611002),MIR8060(dist=65769)	intergenic	opensea	0.126904	0.00847079	Hypermethylated
cg25916527	chr5	FCHO2	Body	FCHO2	intronic	opensea	0.17401	0.00855869	Hypermethylated
cg02541746	chr5	GHR	5'UTR	GHR	intronic	opensea	0.136384	0.00865548	Hypermethylated
cg16008497	chr11		IGR	OR10W1(dist=51237),OR5B17(dist=38628)	intergenic	opensea	0.127715	0.00874432	Hypermethylated
cg11805311	chr10	C10orf116	TSS200	ADIRF(dist=166)	upstream	Island	0.127769	0.00874769	Hypermethylated
cg03169325	chr3		IGR	SNAR-I(dist=48765),OSTN(dist=272426)	intergenic	opensea	0.123658	0.00877103	Hypermethylated
cg18117827	chr8		IGR	SNAI2(dist=29811),PPDPFL(dist=103096)	intergenic	opensea	0.113689	0.00877618	Hypermethylated
cg24687529	chr1	PTGFRN	3'UTR	PTGFRN	UTR3	opensea	0.116292	0.00882178	Hypermethylated
cg06972972	chr2	TPO	Body	TPO	intronic	opensea	0.133095	0.00882536	Hypermethylated
cg06793162	chr6		IGR	HLA-DRA(dist=39565),HLA-DRB5(dist=32742)	intergenic	opensea	0.278854	0.00890017	Hypermethylated
cg18584280	chr15		IGR	FAM189A1(dist=25706),LOC100130111(dist=78506)	intergenic	opensea	0.142201	0.00897397	Hypermethylated
cg03198317	chr3	CASR	5'UTR	CASR	intronic	Island	0.136562	0.0089759	Hypermethylated
cg22113116	chr22		IGR	LINC02554(dist=255892),MN1(dist=174572)	intergenic	opensea	0.365665	0.00901396	Hypermethylated
cg22533406	chr19	FAM83E	Body	FAM83E	exonic	N_Shore	0.187954	0.0091941	Hypermethylated
cg16202967	chr4		IGR	ADH1C(dist=28479),ADH7(dist=31036)	intergenic	opensea	0.204768	0.00922683	Hypermethylated
cg14191040	chr10	CYP2C9	Body	CYP2C9	intronic	opensea	0.190819	0.00927136	Hypermethylated
cg18912574	chr7	NCRNA00174	Body	LINC00174	ncRNA_exonic	S_Shore	0.181286	0.00938306	Hypermethylated
cg20116555	chr4		IGR	TLL1(dist=610912),SPOCK3(dist=18015)	intergenic	opensea	0.158064	0.00944179	Hypermethylated
cg03641849	chr5		IGR	LINC02224(dist=64630),MRPS30-DT(dist=169416)	intergenic	opensea	0.172864	0.00945938	Hypermethylated
cg00816083	chr14		IGR	NID2(dist=106984),PTGDR(dist=91655)	intergenic	opensea	0.107914	0.00954223	Hypermethylated
cg07903023	chr2	KLHL30	5'UTR	KLHL30	intronic	Island	0.137417	0.00956446	Hypermethylated
cg22855737	chr16		IGR	HS3ST2(dist=131989),USP31(dist=13080)	intergenic	opensea	0.101406	0.00960893	Hypermethylated
cg01977108	chr6		IGR	CD109(dist=34380),LOC101928516(dist=206746)	intergenic	opensea	0.109111	0.00967005	Hypermethylated
cg09694381	chr1		IGR	LBR(dist=45793),ENAH(dist=12182)	intergenic	N_Shore	0.129679	0.00968213	Hypermethylated
cg22711009	chr10		IGR	HSPA12A	intronic	opensea	0.127638	0.00968756	Hypermethylated
cg17240004	chr3	CASR	5'UTR	CASR	intronic	N_Shore	0.151075	0.00975722	Hypermethylated
cg25099688	chr6	EYS	Body	EYS	intronic	opensea	0.147303	0.0097602	Hypermethylated
cg26112050	chr14	KIAA1409	Body	UNC79	exonic	opensea	0.106788	0.0097772	Hypermethylated
cg26690318	chr10	PYROXD2	Body	PYROXD2	intronic	opensea	0.423754	0.00984152	Hypermethylated
cg23239675	chr3		IGR	SPATA16(dist=11935),NLGN1(dist=242782)	intergenic	opensea	0.137686	0.00985728	Hypermethylated
cg22595188	chr11		IGR	EHF(dist=69754),APIP(dist=149255)	intergenic	opensea	0.107382	0.0100115	Hypermethylated
cg10766876	chr2	VWA3B	Body	VWA3B	intronic	opensea	0.150127	0.0101397	Hypermethylated
cg11877857	chr9		IGR	LOC101927502(dist=45712),SPATA31D5P(dist=90826)	intergenic	opensea	0.133553	0.0102475	Hypermethylated
cg12773197	chr13		IGR	TEX29(dist=242078),LINC02337(dist=9683)	intergenic	Island	-0.326836	0.0102574	Hypomethylated
cg02744705	chr4	DCLK2	3'UTR	DCLK2	UTR3	S_Shore	0.119992	0.0103026	Hypermethylated
cg06881914	chr11	MS4A6A	TSS1500	MS4A6A	intronic	opensea	0.106919	0.0103222	Hypermethylated
cg13260423	chr3		IGR	LINC01995(dist=253756),ATP11B(dist=32624)	intergenic	opensea	-0.188178	0.0103342	Hypomethylated
cg09714595	chr4	LOC101929194	TSS1500	LNCPRESS2(dist=1109),GRID2(dist=25555)	intergenic	opensea	0.100274	0.0103544	Hypermethylated
cg16861338	chr5		IGR	MAN2A1(dist=8090),LINC01848(dist=5467)	intergenic	opensea	0.123253	0.0104134	Hypermethylated
cg06431433	chr11	OR5F1	TSS1500	OR5F1(dist=1178),OR5AS1(dist=34616)	intergenic	opensea	0.263004	0.0104276	Hypermethylated
cg07187839	chr8		IGR	TRPS1(dist=138928),LINC00536(dist=142606)	intergenic	opensea	0.138881	0.0104491	Hypermethylated
cg16568612	chr12		IGR	SYT10(dist=484564),ALG10(dist=98113)	intergenic	opensea	0.227159	0.0104523	Hypermethylated
cg20288916	chr11		IGR	MIR6128(dist=33582),LINC02735(dist=70915)	intergenic	opensea	0.100174	0.0104578	Hypermethylated
cg15571108	chr16	C16orf74	Body	C16orf74	intronic	Island	0.140954	0.0104944	Hypermethylated
cg05489904	chr5	SCGB3A2	TSS1500	SPINK1(dist=38425),SCGB3A2(dist=1055)	intergenic	opensea	0.128069	0.0104989	Hypermethylated
cg17806614	chr2	DCDC2C	Body	DCDC2C	intronic	opensea	0.220201	0.010516	Hypermethylated
cg15157967	chr11		IGR	OR52Z1(dist=7711),OR51V1(dist=13313)	intergenic	opensea	0.100551	0.0105294	Hypermethylated
cg14802742	chr2		IGR	LOC101927967(dist=251137),LOC105374820(dist=3663)	intergenic	opensea	-0.154806	0.0105852	Hypomethylated
cg09856045	chr6	LOC101928516	Body	LOC101928516	ncRNA_intronic	opensea	0.144501	0.010682	Hypermethylated
cg17933226	chr19	SLC5A5	TSS1500	RPL18A(dist=7164),SLC5A5(dist=1462)	intergenic	N_Shore	0.140662	0.0107875	Hypermethylated
cg22592525	chr12		IGR	SYT10(dist=484198),ALG10(dist=98479)	intergenic	opensea	0.153155	0.0108026	Hypermethylated
cg00543099	chr6		IGR	PTCHD4(dist=661278),MMUT(dist=700370)	intergenic	opensea	0.118323	0.0109144	Hypermethylated
cg01858500	chr17		IGR	KCNJ2(dist=26383),CASC17(dist=891349)	intergenic	opensea	-0.45364	0.010924	Hypomethylated
cg12104172	chr14	UNC79	Body	UNC79	exonic	opensea	0.113793	0.0109603	Hypermethylated
cg22752924	chr3		IGR	OR5H15(dist=90510),OR5H6(dist=4093)	intergenic	opensea	0.128874	0.0109822	Hypermethylated
cg15886040	chr11	H19	TSS1500	H19	ncRNA_intronic	Island	0.106356	0.0110128	Hypermethylated
cg03801949	chr6	ARMC12	Body	ARMC12	intronic	opensea	0.142229	0.0110454	Hypermethylated
cg19365810	chr7	MLL3	Body	KMT2C	intronic	Island	0.13642	0.0110829	Hypermethylated
cg26874473	chr1	DNAH14	Body	DNAH14	intronic	opensea	0.186557	0.0111381	Hypermethylated
cg21810373	chr11	SHANK2	5'UTR	SHANK2	intronic	opensea	0.113511	0.0111857	Hypermethylated
cg15601996	chr12		IGR	LRIG3(dist=401673),SLC16A7(dist=273818)	intergenic	opensea	0.10394	0.0113103	Hypermethylated
cg06193725	chr7	ZNF138	Body	NONE(dist=NONE),NONE(dist=NONE)	intergenic	opensea	-0.171112	0.0113304	Hypomethylated
cg17150171	chr17	KRTAP9-3	1stExon	KRTAP9-3	UTR3	opensea	0.123445	0.0113498	Hypermethylated
cg14185508	chr10		IGR	AKR1C4(dist=25178),LINC02561(dist=21862)	intergenic	opensea	0.15025	0.0114187	Hypermethylated
cg19600494	chr2		IGR	UXS1(dist=148730),LOC402096(dist=26676)	intergenic	Island	0.170119	0.0114864	Hypermethylated
cg06074146	chr13		IGR	IL17D(dist=1212),EEF1AKMT1(dist=4421)	intergenic	S_Shelf	0.106182	0.0115482	Hypermethylated
cg15937641	chr1	PTGFRN	3'UTR	PTGFRN	UTR3	opensea	0.134309	0.011713	Hypermethylated
cg20577761	chr22	ASPHD2	Body	ASPHD2	exonic	Island	0.186428	0.011735	Hypermethylated
cg21483818	chr12		IGR	SYT10(dist=483823),ALG10(dist=98854)	intergenic	opensea	0.214554	0.0117858	Hypermethylated
cg19886683	chr12		IGR	KITLG(dist=255883),LINC02458(dist=174770)	intergenic	opensea	0.178683	0.0118125	Hypermethylated
cg06355467	chr5		IGR	OR4F29(dist=81058),NONE(dist=NONE)	intergenic	Island	-0.163698	0.0119142	Hypomethylated
cg15864962	chr16		IGR	CPHXL(dist=62756),CNTNAP4(dist=488155)	intergenic	opensea	-0.109818	0.012047	Hypomethylated
cg09994094	chr12		IGR	OR9K2(dist=46720),OR10A7(dist=43529)	intergenic	opensea	0.235955	0.0120627	Hypermethylated
cg24677472	chr5		IGR	EDIL3(dist=445577),NBPF22P(dist=1451987)	intergenic	opensea	-0.106297	0.0121124	Hypomethylated
cg26645761	chr12		IGR	RIMBP2(dist=70473),STX2(dist=2822)	intergenic	opensea	0.132285	0.0121544	Hypermethylated
cg07072357	chr10		IGR	ADAM12(dist=4050),LINC00601(dist=21342)	intergenic	S_Shelf	0.102356	0.0122348	Hypermethylated
cg08605584	chr7	NCAPG2	Body	NCAPG2	intronic	opensea	0.168233	0.0123072	Hypermethylated
cg13079212	chr6		IGR	TSG1(dist=975176),MANEA-DT(dist=546458)	intergenic	opensea	0.203476	0.0123255	Hypermethylated
cg04591230	chr13	SGCG	3'UTR	SGCG	UTR3	opensea	0.11711	0.0124998	Hypermethylated
cg05392577	chr2		IGR	LOC101927967(dist=251159),LOC105374820(dist=3641)	intergenic	opensea	-0.203982	0.0125694	Hypomethylated
cg13104844	chr4		IGR	CTBP1-DT(dist=9477),MAEA(dist=27407)	intergenic	opensea	0.179076	0.0125894	Hypermethylated
cg04558424	chr16	C16orf74	Body	C16orf74	intronic	Island	0.114027	0.0125967	Hypermethylated
cg26111238	chr21		IGR	MIR99AHG(dist=496488),LINC01549(dist=310674)	intergenic	opensea	0.107462	0.0126635	Hypermethylated
cg05332565	chr6		IGR	AKAP7(dist=38181),ARG1(dist=251513)	intergenic	opensea	0.210909	0.0126801	Hypermethylated
cg15139063	chr2		IGR	UXS1(dist=149073),LOC402096(dist=26333)	intergenic	S_Shore	0.19454	0.0127496	Hypermethylated
cg13231210	chr6	LOC101928516	Body	LOC101928516	ncRNA_intronic	opensea	0.140772	0.0127526	Hypermethylated
cg05347853	chr3		IGR	LAMP3(dist=2347),MCF2L2(dist=12923)	intergenic	S_Shelf	-0.149329	0.0128589	Hypomethylated
cg21611669	chr10		IGR	LINC02561(dist=34200),UCN3(dist=59530)	intergenic	opensea	0.15972	0.0129013	Hypermethylated
cg14821733	chr5		IGR	MARCOL(dist=653)	upstream	opensea	0.213427	0.012906	Hypermethylated
cg06608399	chr4		IGR	ZBTB49(dist=18034),NSG1(dist=46439)	intergenic	opensea	0.255949	0.0129745	Hypermethylated
cg13656404	chr2		IGR	UXS1(dist=148589),LOC402096(dist=26817)	intergenic	Island	0.178306	0.0129889	Hypermethylated
cg15216172	chr2		IGR	PUM2(dist=59360),RHOB(dist=35461)	intergenic	opensea	-0.131459	0.0130016	Hypomethylated
cg09806683	chr1	SKI	3'UTR	SKI	UTR3	Island	0.123137	0.0131095	Hypermethylated
cg16301282	chr16		IGR	LINC02140(dist=263056),LOC101927480(dist=213495)	intergenic	opensea	-0.102019	0.0131225	Hypomethylated
cg01631215	chr3	SUCLG2	TSS1500	SUCLG2-AS1	ncRNA_intronic	S_Shore	-0.112229	0.0131718	Hypomethylated
cg21459919	chr1		IGR	ESPNP(dist=4740),RNVU1-18(dist=15619)	intergenic	N_Shore	0.130305	0.0132732	Hypermethylated
cg26112909	chr1	LDLRAD2	3'UTR	LDLRAD2	UTR3	S_Shore	-0.104139	0.0133495	Hypomethylated
cg17376726	chr3	LOC101927394	Body	LOC101927394	ncRNA_exonic	opensea	0.126834	0.0134347	Hypermethylated
cg05539370	chr4	STOX2	Body	STOX2	exonic	opensea	0.14743	0.0135239	Hypermethylated
cg09964402	chr11		IGR	EHF(dist=94250),APIP(dist=124759)	intergenic	opensea	0.1134	0.0135242	Hypermethylated
cg23791672	chr11	DLG2	3'UTR	DLG2	UTR3	opensea	0.143408	0.0135611	Hypermethylated
cg13871565	chr1		IGR	DESI2(dist=101231),COX20(dist=25043)	intergenic	opensea	0.118322	0.0136904	Hypermethylated
cg20103565	chr6		IGR	BCKDHB(dist=157586),TENT5A(dist=1241874)	intergenic	opensea	0.156324	0.0137341	Hypermethylated
cg10183345	chr15	OCA2	Body	OCA2	intronic	S_Shore	0.160396	0.0137976	Hypermethylated
cg14018461	chr20		IGR	SLC24A3(dist=101100),RIN2(dist=62495)	intergenic	opensea	0.166695	0.0137988	Hypermethylated
cg14569837	chr11	OR5AS1	1stExon	OR5AS1	exonic	opensea	0.149739	0.013927	Hypermethylated
cg12318285	chr4	SCFD2	Body	SCFD2	intronic	opensea	0.108326	0.0139346	Hypermethylated
cg17141276	chr20		IGR	SLC24A3(dist=101093),RIN2(dist=62502)	intergenic	opensea	0.156035	0.0139474	Hypermethylated
cg12829747	chr5		IGR	LINC01470(dist=484235),GRIA1(dist=33940)	intergenic	opensea	0.151711	0.0139618	Hypermethylated
cg10672482	chr12	OR6C3	1stExon	OR6C3	exonic	opensea	0.115704	0.0139621	Hypermethylated
cg22514699	chr2		IGR	MGAT5	intronic	opensea	-0.107653	0.0139648	Hypomethylated
cg20882793	chr19	JSRP1	TSS200	JSRP1(dist=159)	upstream	S_Shelf	0.146335	0.0139825	Hypermethylated
cg00400096	chr11		IGR	LRRC4C(dist=163327),LINC01499(dist=91589)	intergenic	opensea	-0.114543	0.0140264	Hypomethylated
cg08785944	chr17	NXN	TSS200	NXN	intronic	opensea	-0.271588	0.0140462	Hypomethylated
cg19035493	chr10		IGR	AKR1C4(dist=14972),LINC02561(dist=32068)	intergenic	opensea	0.20088	0.0140669	Hypermethylated
cg01754756	chr10	C10orf116	TSS200	ADIRF(dist=161)	upstream	Island	0.116527	0.0140931	Hypermethylated
cg02258381	chr10		IGR	PROSER2-AS1	ncRNA_intronic	N_Shore	0.127983	0.0142353	Hypermethylated
cg22311344	chr13		IGR	MIR548X2(dist=172998),MIR4704(dist=78823)	intergenic	opensea	0.126608	0.0142439	Hypermethylated
cg00798477	chr8	RIMS2	Body	RIMS2	intronic	opensea	0.133969	0.0143607	Hypermethylated
cg06053634	chr6	CPNE5	Body	CPNE5	intronic	opensea	-0.166453	0.0143766	Hypomethylated
cg20483325	chr12		IGR	TMTC1(dist=60114),IPO8(dist=784109)	intergenic	opensea	0.188589	0.0144404	Hypermethylated
cg00171290	chr7	C7orf50	Body	C7orf50	intronic	S_Shelf	0.161311	0.0144642	Hypermethylated
cg05223897	chr7	NCRNA00174	Body	LINC00174	ncRNA_exonic	Island	0.193135	0.0144873	Hypermethylated
cg26807989	chr7		IGR	EIF3IP1(dist=130386),IMMP2L(dist=572044)	intergenic	opensea	0.139544	0.0144968	Hypermethylated
cg04976219	chr15		IGR	MNS1(dist=93710),ZNF280D(dist=71329)	intergenic	opensea	0.162153	0.0145118	Hypermethylated
cg01203254	chr20		IGR	SLC24A3(dist=101323),RIN2(dist=62272)	intergenic	opensea	0.183372	0.0145424	Hypermethylated
cg02344606	chr7	IFRD1	TSS1500	IFRD1(dist=902)	upstream	opensea	-0.225897	0.0146855	Hypomethylated
cg03149135	chr11		IGR	CCDC90B(dist=155558),DLG2(dist=13048)	intergenic	opensea	0.190084	0.0147091	Hypermethylated
cg25345625	chr10		IGR	MGMT(dist=7642),EBF3(dist=56608)	intergenic	N_Shore	0.173804	0.0147549	Hypermethylated
cg12253859	chr10	CYP2C9	3'UTR	CYP2C9	UTR3	opensea	0.112373	0.0148176	Hypermethylated
cg02854879	chr11	DLG2	Body	DLG2	intronic	opensea	0.237557	0.0148694	Hypermethylated
cg11051546	chr1		IGR	CENPF(dist=159770),KCNK2(dist=181201)	intergenic	opensea	-0.178439	0.014917	Hypomethylated
cg26394636	chr10		IGR	PROSER2-AS1	ncRNA_intronic	N_Shore	0.117112	0.0150019	Hypermethylated
cg17406248	chr9	C9orf3	Body	AOPEP	intronic	Island	0.160544	0.0150088	Hypermethylated
cg04837653	chr3	MAGI1	Body	MAGI1	intronic	opensea	0.105178	0.0150246	Hypermethylated
cg06480930	chr12		IGR	SLC38A1(dist=63415),SLC38A2(dist=25730)	intergenic	opensea	0.116152	0.0150866	Hypermethylated
cg04657736	chr6		IGR	BCKDHB(dist=142109),TENT5A(dist=1257351)	intergenic	opensea	0.117229	0.0151507	Hypermethylated
cg25974442	chr19	MAST3	Body	MAST3	intronic	N_Shelf	0.101	0.0151525	Hypermethylated
cg16327740	chr1		IGR	LINC02789(dist=117185),NR5A2(dist=517218)	intergenic	opensea	0.103388	0.0151679	Hypermethylated
cg26314069	chr13		IGR	SPRY2(dist=529181),LINC00377(dist=148084)	intergenic	opensea	-0.349022	0.0152154	Hypomethylated
cg11037732	chr12		IGR	MUCL1(dist=74293),TESPA1(dist=15336)	intergenic	opensea	0.219557	0.0152979	Hypermethylated
cg22827729	chr6	MIR7641-2	TSS1500	LOC102724096(dist=237241),LINC02533(dist=61528)	intergenic	opensea	0.137915	0.0153303	Hypermethylated
cg00051662	chr10	CYP2C19	TSS1500	CYP2C18(dist=25139),CYP2C19(dist=1352)	intergenic	opensea	0.114389	0.0153366	Hypermethylated
cg13991154	chr3	TRANK1	Body	TRANK1	intronic	opensea	0.187847	0.0153378	Hypermethylated
cg13129716	chr6	EYS	Body	EYS	intronic	opensea	0.140838	0.0153648	Hypermethylated
cg15922305	chr11	H19	TSS200	H19	ncRNA_intronic	N_Shore	0.1561	0.0153943	Hypermethylated
cg06040034	chr8	DLGAP2	Body	DLGAP2	intronic	S_Shore	0.158312	0.0154069	Hypermethylated
cg08475401	chr8		IGR	MYOM2(dist=50361),LOC101927815(dist=243478)	intergenic	opensea	-0.116263	0.0154199	Hypomethylated
cg17638856	chr8	DLGAP2	Body	DLGAP2	intronic	Island	0.133632	0.0154888	Hypermethylated
cg10175028	chr12		IGR	CCDC91(dist=159072),FAR2(dist=440040)	intergenic	opensea	0.116525	0.0156107	Hypermethylated
cg06021433	chr18		IGR	CEP192(dist=6479),LDLRAD4(dist=87245)	intergenic	opensea	0.115584	0.0156631	Hypermethylated
cg19114460	chr19	IRGC	Body	IRGC	exonic	Island	0.133567	0.0157014	Hypermethylated
cg13206941	chr4		IGR	MIR3945HG(dist=4442),LINC01093(dist=32906)	intergenic	opensea	-0.101099	0.0157126	Hypomethylated
cg00493242	chr4		IGR	SLIT2(dist=37914),NONE(dist=NONE)	intergenic	opensea	0.129442	0.0157191	Hypermethylated
cg14812222	chr13		IGR	USPL1(dist=36818),ALOX5AP(dist=15898)	intergenic	opensea	0.108932	0.015765	Hypermethylated
cg22672282	chr19	IRGC	Body	IRGC	exonic	Island	0.135544	0.0158395	Hypermethylated
cg25420839	chr7	HIBADH	Body	HIBADH	intronic	opensea	0.128411	0.0158766	Hypermethylated
cg13229520	chr5		IGR	LINC02106(dist=376558),LOC642366(dist=25992)	intergenic	opensea	0.108333	0.0158938	Hypermethylated
cg20641425	chr11	WT1	Body	WT1	exonic	opensea	-0.106468	0.0159094	Hypomethylated
cg06371443	chr3	CASR	5'UTR	CASR	intronic	Island	0.169252	0.0159254	Hypermethylated
cg02963613	chr2	TPO	Body	TPO	intronic	opensea	0.126032	0.0159498	Hypermethylated
cg01869360	chr2		IGR	RGPD1(dist=30141),KRCC1(dist=11274)	intergenic	N_Shore	0.124032	0.0159684	Hypermethylated
cg12992745	chr8	ERICH1	Body	ERICH1	intronic	S_Shore	0.138627	0.015981	Hypermethylated
cg02095624	chr10	AKR1C8P	Body	AKR1C8P	ncRNA_intronic	opensea	0.107637	0.0160021	Hypermethylated
cg21280986	chr18		IGR	MTCL1(dist=58702),NDUFV2(dist=211219)	intergenic	opensea	0.105642	0.0160755	Hypermethylated
cg22856976	chr1		IGR	MR1(dist=16507),IER5(dist=10255)	intergenic	opensea	0.365656	0.0161923	Hypermethylated
cg03507064	chr3		IGR	LINC02008(dist=1746446),LINC00971(dist=428284)	intergenic	opensea	0.14217	0.0162039	Hypermethylated
cg22557409	chr19	JSRP1	TSS200	JSRP1(dist=52)	upstream	S_Shelf	0.115711	0.016223	Hypermethylated
cg11510499	chr8		IGR	XKR9(dist=69363),EYA1(dist=392128)	intergenic	opensea	0.138599	0.0162282	Hypermethylated
cg18139075	chr12	OR6C3	TSS1500	OR6C3(dist=973)	upstream	opensea	0.128742	0.0162732	Hypermethylated
cg14373685	chr10		IGR	AKR1C4(dist=15124),LINC02561(dist=31916)	intergenic	opensea	0.206115	0.0164667	Hypermethylated
cg26189965	chr1		IGR	CTH(dist=177944),LINC01788(dist=88658)	intergenic	opensea	0.111132	0.016477	Hypermethylated
cg20750905	chr2		IGR	ATP5MC3(dist=682664),LNPK(dist=59508)	intergenic	opensea	-0.181718	0.0164901	Hypomethylated
cg02313709	chr11		IGR	GLYAT(dist=31078),GLYATL2(dist=71015)	intergenic	opensea	0.118334	0.0165869	Hypermethylated
cg05498053	chr6	SAMD3	5'UTR	SAMD3	intronic	opensea	0.128952	0.0166116	Hypermethylated
cg18499978	chr10	LOC105376360	Body	LOC105376360	ncRNA_intronic	opensea	0.166244	0.0166484	Hypermethylated
cg17104182	chr11	OR5AS1	TSS1500	OR5F1(dist=34640),OR5AS1(dist=1154)	intergenic	opensea	0.117632	0.0166926	Hypermethylated
cg25223285	chr2		IGR	LIMS2(dist=13900),WDR33(dist=5345)	intergenic	Island	0.12975	0.0167515	Hypermethylated
cg09363850	chr11		IGR	OR10W1(dist=54702),OR5B17(dist=35163)	intergenic	opensea	0.149799	0.0167588	Hypermethylated
cg24360892	chr13		IGR	TEX29(dist=242619),LINC02337(dist=9142)	intergenic	S_Shore	-0.314129	0.0168161	Hypomethylated
cg27332196	chr3		IGR	EPHA3(dist=599566),NONE(dist=NONE)	intergenic	opensea	0.129166	0.0168648	Hypermethylated
cg10176489	chr16		IGR	SHISA9(dist=14340),ERCC4(dist=665398)	intergenic	opensea	0.11557	0.0168808	Hypermethylated
cg02858960	chr13	SGCG	Body	SGCG	intronic	opensea	0.146042	0.0168957	Hypermethylated
cg05820623	chr1		IGR	LINC01346(dist=248989),LINC01777(dist=210479)	intergenic	opensea	0.103927	0.01693	Hypermethylated
cg25398593	chr12	TMEM117	5'UTR	TMEM117	intronic	opensea	0.120447	0.0169645	Hypermethylated
cg17585493	chr6	CPNE5	Body	CPNE5	intronic	opensea	-0.167852	0.0170168	Hypomethylated
cg17471331	chr22		IGR	LINC02554(dist=256219),MN1(dist=174245)	intergenic	opensea	0.101018	0.0170447	Hypermethylated
cg05357777	chr14		IGR	EGLN3(dist=73403),SPTSSA(dist=408313)	intergenic	opensea	-0.248057	0.0171721	Hypomethylated
cg10558145	chr1		IGR	CRP(dist=12861),DUSP23(dist=53512)	intergenic	opensea	0.14048	0.0172616	Hypermethylated
cg26917242	chr2		IGR	LOC105373782(dist=123199),FSIP2-AS2(dist=429603)	intergenic	opensea	-0.122352	0.0172718	Hypomethylated
cg01419136	chr5		IGR	LOC101927357(dist=569)	upstream	opensea	0.110642	0.0172773	Hypermethylated
cg04876252	chr9	CKS2	Body	CKS2	intronic	S_Shelf	-0.105891	0.0173069	Hypomethylated
cg10131808	chr8		IGR	SNX16(dist=70408),LOC101927141(dist=999410)	intergenic	opensea	0.133587	0.0173108	Hypermethylated
cg08163927	chr1	KCNAB2	5'UTR	KCNAB2	intronic	opensea	0.129266	0.0173596	Hypermethylated
cg07396272	chr12	SLCO1B3	Body	SLCO1B3,SLCO1B3-SLCO1B7	intronic	opensea	0.116161	0.0173619	Hypermethylated
cg11794356	chr12	OR6C3	1stExon	OR6C3	exonic	opensea	0.242081	0.0173716	Hypermethylated
cg16503259	chr6		IGR	AKAP7(dist=226872),ARG1(dist=62822)	intergenic	opensea	0.128558	0.0174131	Hypermethylated
cg13328955	chr12		IGR	SLC16A7(dist=1188631),TAFA2(dist=729777)	intergenic	opensea	0.138974	0.0174433	Hypermethylated
cg00444390	chr11	OR10A6	TSS200	OR10A6(dist=16)	upstream	opensea	0.127059	0.0174902	Hypermethylated
cg19937378	chr14	KIAA1409	Body	UNC79	exonic	opensea	0.161615	0.0175018	Hypermethylated
cg12136439	chr15	RGMA	Body	RGMA	intronic	Island	0.115884	0.0175022	Hypermethylated
cg15446115	chr16	C16orf74	Body	C16orf74	splicing	Island	0.14686	0.0176332	Hypermethylated
cg25851044	chr3		IGR	MTHFD2P1(dist=68578),MIR8060(dist=608193)	intergenic	opensea	0.168567	0.017653	Hypermethylated
cg00484904	chr10		IGR	LINC01375(dist=173561),LINC02653(dist=271587)	intergenic	opensea	0.154528	0.0176582	Hypermethylated
cg20516306	chr5		IGR	KCTD16(dist=81570),PRELID2(dist=1189088)	intergenic	opensea	0.190367	0.0176626	Hypermethylated
cg12091936	chr11		IGR	CTTN(dist=20844),SHANK2(dist=10426)	intergenic	opensea	0.101267	0.0176778	Hypermethylated
cg02516577	chr8		IGR	CNBD1(dist=139795),DCAF4L2(dist=348094)	intergenic	opensea	0.149132	0.0176948	Hypermethylated
cg10448052	chr12	AAAS	TSS1500	AAAS(dist=393)	upstream	S_Shore	-0.101049	0.0177158	Hypomethylated
cg18671932	chr6		IGR	LOC101928516	ncRNA_intronic	opensea	0.164898	0.0177458	Hypermethylated
cg18712566	chr13		IGR	TEX29(dist=242751),LINC02337(dist=9010)	intergenic	S_Shore	-0.309592	0.0178067	Hypomethylated
cg27457427	chr4	STOX2	Body	STOX2	exonic	opensea	0.127786	0.017869	Hypermethylated
cg03230757	chr22	ASPHD2	Body	ASPHD2	exonic	Island	0.162396	0.0179301	Hypermethylated
cg06268510	chr11		IGR	CTTN(dist=20617),SHANK2(dist=10653)	intergenic	opensea	0.113089	0.0179451	Hypermethylated
cg14880894	chr4	CNOT6L	Body	CNOT6L	intronic	opensea	0.112378	0.0179494	Hypermethylated
cg17985533	chr11	H19	TSS200	H19	ncRNA_intronic	N_Shore	0.170115	0.0179958	Hypermethylated
cg27483417	chr3		IGR	HTR1F	intronic	opensea	0.183615	0.0180082	Hypermethylated
cg18653222	chr5		IGR	FAM170A(dist=622111),PRR16(dist=206345)	intergenic	opensea	0.110779	0.0181392	Hypermethylated
cg15939357	chr19	IRGC	Body	IRGC	exonic	Island	0.133482	0.0181745	Hypermethylated
cg24798414	chr8	KCNB2	Body	KCNB2	exonic	opensea	0.144181	0.0181975	Hypermethylated
cg22413825	chr4		IGR	LINC01182(dist=87521),LINC01085(dist=93219)	intergenic	opensea	0.117825	0.0184078	Hypermethylated
cg19953728	chr2	LOC100329109	Body	GCSHP3	ncRNA_exonic	opensea	0.137405	0.0186348	Hypermethylated
cg14672308	chr10		IGR	LINC01435(dist=1057534),XPNPEP1(dist=737939)	intergenic	opensea	0.100394	0.0187182	Hypermethylated
cg11655515	chr21		IGR	CHODL-AS1(dist=16470),CHODL(dist=15262)	intergenic	opensea	-0.111216	0.018737	Hypomethylated
cg09061475	chr19	TLE6	Body	TLE6	exonic	opensea	0.164595	0.018752	Hypermethylated
cg02887537	chr16	JPH3	Body	JPH3	intronic	S_Shore	0.101057	0.0188278	Hypermethylated
cg18298050	chr22	ASPHD2	Body	ASPHD2	exonic	Island	0.15526	0.0189036	Hypermethylated
cg03106441	chr5	STARD4-AS1	Body	STARD4-AS1	ncRNA_intronic	opensea	0.108556	0.0189232	Hypermethylated
cg02275784	chr11	DLG2	Body	DLG2	intronic	opensea	0.181157	0.018942	Hypermethylated
cg03230975	chr2	GPR39	Body	GPR39	intronic	opensea	0.127843	0.0190481	Hypermethylated
cg04975775	chr11	H19	TSS1500	H19	ncRNA_intronic	Island	0.135066	0.0190871	Hypermethylated
cg16287373	chr21	NRIP1	5'UTR	NRIP1	intronic	opensea	0.226147	0.0191233	Hypermethylated
cg16925177	chr8	KCNB2	Body	KCNB2	exonic	opensea	0.107104	0.0191271	Hypermethylated
cg00508479	chr10	GRID1	Body	GRID1	intronic	opensea	0.150447	0.0192031	Hypermethylated
cg01992832	chr14	KIAA1409	Body	UNC79	exonic	opensea	0.114848	0.0192236	Hypermethylated
cg24952754	chr5	TSSK1B	1stExon	TSSK1B	UTR3	opensea	0.186466	0.0192267	Hypermethylated
cg00002154	chr4		IGR	LINC02429(dist=28978),MIR548AG1(dist=1846682)	intergenic	opensea	0.103059	0.0192817	Hypermethylated
cg21050890	chr5		IGR	MARCOL(dist=565)	upstream	opensea	0.203329	0.0192851	Hypermethylated
cg27176043	chr8		IGR	DLGAP2	intronic	Island	0.180188	0.019314	Hypermethylated
cg26218242	chr5		IGR	CPLX2(dist=8642),THOC3(dist=66868)	intergenic	opensea	0.157989	0.0193431	Hypermethylated
cg03714754	chr15	CORO2B	Body	CORO2B	intronic	opensea	0.141648	0.0193544	Hypermethylated
cg03691144	chr13		IGR	TEX29(dist=242277),LINC02337(dist=9484)	intergenic	Island	-0.287035	0.0193642	Hypomethylated
cg27505447	chr10	CYP2C19	TSS200	CYP2C19(dist=174)	upstream	opensea	0.230368	0.0195923	Hypermethylated
cg06122361	chr5		IGR	ST8SIA4(dist=443595),SLCO4C1(dist=887111)	intergenic	opensea	0.15894	0.0195938	Hypermethylated
cg09585653	chr12	SLC38A2	Body	SLC38A2	intronic	opensea	-0.10384	0.019642	Hypomethylated
cg21100167	chr21	PCBP3	Body	PCBP3	intronic	S_Shore	0.140562	0.019683	Hypermethylated
cg09761281	chr12		IGR	DCD(dist=181521),MUCL1(dist=24630)	intergenic	opensea	0.20356	0.0197407	Hypermethylated
cg05902483	chr6	RIPK1	Body	RIPK1	exonic	opensea	0.164023	0.0197476	Hypermethylated
cg20428196	chr6		IGR	LOC101928516	ncRNA_intronic	opensea	0.185309	0.0197923	Hypermethylated
cg27355432	chr14		IGR	DAAM1(dist=73072),GPR135(dist=16282)	intergenic	opensea	-0.126047	0.0198117	Hypomethylated
cg16777557	chr11		IGR	LINC01493(dist=887102),LRRC4C(dist=571850)	intergenic	opensea	0.133058	0.0198155	Hypermethylated
cg15374032	chr1	SLC44A5	Body	SLC44A5	intronic	opensea	0.112202	0.0198722	Hypermethylated
cg02610220	chr4		IGR	LINC02380(dist=253931),LINC02494(dist=804597)	intergenic	opensea	0.227846	0.0198957	Hypermethylated
cg00355768	chr18		IGR	DLGAP1(dist=533044),LINC01892(dist=92830)	intergenic	opensea	0.177239	0.0199227	Hypermethylated
cg08073868	chr8		IGR	LOC102724874(dist=675286),PKIA(dist=364722)	intergenic	opensea	0.109879	0.0199563	Hypermethylated
cg01977486	chr11	H19	TSS1500	H19	ncRNA_intronic	Island	0.107274	0.019986	Hypermethylated
cg15183772	chr9		IGR	LOC101927502(dist=44879),SPATA31D5P(dist=91659)	intergenic	opensea	0.153417	0.0200298	Hypermethylated
cg00636145	chr19	IRGC	Body	IRGC	exonic	Island	0.123484	0.0201447	Hypermethylated
cg12641387	chr1	DNAH14	5'UTR	DNAH14	intronic	opensea	0.19161	0.0202348	Hypermethylated
cg09411876	chr11	DLG2	Body	DLG2	intronic	opensea	0.185935	0.0202389	Hypermethylated
cg02100474	chr14	KIAA1409	Body	UNC79	exonic	opensea	0.104532	0.0202598	Hypermethylated
cg06605206	chr6		IGR	BMP5(dist=144040),COL21A1(dist=36960)	intergenic	opensea	0.136681	0.0202959	Hypermethylated
cg06741367	chr2		IGR	LIMS2(dist=13748),WDR33(dist=5497)	intergenic	N_Shore	0.14415	0.0203586	Hypermethylated
cg18210294	chr11		IGR	MIR8068(dist=586589),LINC02546(dist=530276)	intergenic	opensea	0.197897	0.0203625	Hypermethylated
cg05964600	chr5	HCN1	Body	HCN1	intronic	opensea	0.156422	0.020378	Hypermethylated
cg10154826	chr6	FAM8A1	1stExon	FAM8A1	exonic	Island	0.225526	0.0204289	Hypermethylated
cg20304252	chr3		IGR	CRBN(dist=448987),LOC100130207(dist=72110)	intergenic	opensea	0.130623	0.0204934	Hypermethylated
cg01077654	chr11		IGR	ARHGEF12(dist=10727),GRIK4(dist=11082)	intergenic	opensea	-0.226845	0.0205116	Hypomethylated
cg02073054	chr1	IL19	TSS1500	IL19	intronic	opensea	0.166139	0.0205193	Hypermethylated
cg16810339	chr12		IGR	SLCO1B3-SLCO1B7	intronic	opensea	0.162797	0.0205962	Hypermethylated
cg22958188	chr13		IGR	TEX29(dist=242203),LINC02337(dist=9558)	intergenic	Island	-0.249828	0.0206335	Hypomethylated
cg23259721	chr21		IGR	NCAM2(dist=23017),LINC00317(dist=156946)	intergenic	opensea	0.109372	0.0206409	Hypermethylated
cg10337211	chr8		IGR	MMP16(dist=630418),LOC101929709(dist=759497)	intergenic	opensea	0.117565	0.0206722	Hypermethylated
cg01972335	chr9	PNPLA7	Body	PNPLA7	intronic	N_Shore	0.100876	0.0207754	Hypermethylated
cg06373584	chr4		IGR	ZBTB49(dist=17953),NSG1(dist=46520)	intergenic	opensea	0.231601	0.0208968	Hypermethylated
cg04585390	chr17	SLC5A10	Body	SLC5A10	intronic	Island	0.13642	0.0209177	Hypermethylated
cg13622436	chr4		IGR	ZBTB49(dist=17887),NSG1(dist=46586)	intergenic	opensea	0.200462	0.0209686	Hypermethylated
cg12606455	chr2		IGR	UXS1(dist=149083),LOC402096(dist=26323)	intergenic	S_Shore	0.167088	0.0209877	Hypermethylated
cg07838270	chr16		IGR	LINC02188(dist=90090),LINC02181(dist=229868)	intergenic	opensea	0.102312	0.0210331	Hypermethylated
cg03525385	chr1	KCND3	Body	KCND3	intronic	opensea	0.1101	0.021064	Hypermethylated
cg07201638	chr21	CLDN17	1stExon	CLDN17	exonic	opensea	0.126475	0.0211104	Hypermethylated
cg19118077	chr10	AKR1C3	Body	AKR1C3	intronic	opensea	0.135142	0.0213572	Hypermethylated
cg09519580	chr1		IGR	PLPPR4(dist=97486),LINC01708(dist=65352)	intergenic	opensea	0.132114	0.0213751	Hypermethylated
cg26360968	chr10		IGR	MGMT(dist=7375),EBF3(dist=56875)	intergenic	N_Shore	0.122968	0.0213826	Hypermethylated
cg17557099	chr11	OR51B5	Body	OR51J1	exonic	opensea	0.158148	0.0214737	Hypermethylated
cg27484582	chr7		IGR	GRIFIN(dist=2706),LFNG(dist=33440)	intergenic	opensea	0.140041	0.0214793	Hypermethylated
cg20002045	chr21	SLC37A1	TSS200	SLC37A1(dist=61)	upstream	S_Shelf	-0.124731	0.0215006	Hypomethylated
cg20213005	chr9	ADAMTSL1	Body	ADAMTSL1	intronic	opensea	0.100198	0.0215964	Hypermethylated
cg02344187	chr12		IGR	LINC02444(dist=835428),LOC100507377(dist=89431)	intergenic	opensea	0.140791	0.0216017	Hypermethylated
cg27658460	chr18		IGR	LINC01029(dist=691499),SALL3(dist=343093)	intergenic	N_Shore	-0.113674	0.0216206	Hypomethylated
cg02371536	chr11		IGR	OR5AN1(dist=15428),OR5A2(dist=41157)	intergenic	opensea	0.103354	0.0216571	Hypermethylated
cg07064315	chr18	RPRD1A	Body	RPRD1A	intronic	N_Shelf	-0.118285	0.0216877	Hypomethylated
cg12182078	chr2	SERTAD2	5'UTR	SERTAD2	intronic	opensea	0.106549	0.021904	Hypermethylated
cg15520955	chr1	KIF26B	Body	KIF26B	intronic	opensea	0.102596	0.0221002	Hypermethylated
cg03466385	chr12		IGR	TMTC1(dist=512188),IPO8(dist=332035)	intergenic	opensea	0.125115	0.0221562	Hypermethylated
cg08010020	chr11	OR52B6	TSS1500	OR52B6(dist=848)	upstream	opensea	0.119331	0.0221905	Hypermethylated
cg16176929	chr11	KCNC1	Body	KCNC1	exonic	Island	0.119063	0.0222082	Hypermethylated
cg20336921	chr6		IGR	BCKDHB(dist=262012),TENT5A(dist=1137448)	intergenic	opensea	0.206604	0.0222191	Hypermethylated
cg09352925	chr12		IGR	LOC105369632(dist=7747),LRRC23(dist=7717)	intergenic	opensea	0.307522	0.0222471	Hypermethylated
cg17886022	chr7	LINC00174	Body	LINC00174	ncRNA_exonic	S_Shore	0.215446	0.0222727	Hypermethylated
cg24483264	chr6		IGR	CD109(dist=70519),LOC101928516(dist=170607)	intergenic	opensea	0.146614	0.0223546	Hypermethylated
cg08651153	chr4	TRIM2	Body	TRIM2	intronic	opensea	-0.174151	0.022377	Hypomethylated
cg18556129	chr19	JSRP1	TSS1500	JSRP1(dist=788)	upstream	S_Shelf	0.120194	0.022439	Hypermethylated
cg20732801	chr4		IGR	LINC02428(dist=108152),TACR3(dist=38153)	intergenic	opensea	0.118132	0.0224427	Hypermethylated
cg08899239	chr1		IGR	LRIF1(dist=118926),DRAM2(dist=34300)	intergenic	opensea	0.167222	0.0224525	Hypermethylated
cg07175288	chr18		IGR	LINC01029(dist=560754),SALL3(dist=473838)	intergenic	Island	0.139519	0.0225191	Hypermethylated
cg19522930	chr11		IGR	IGSF9B(dist=11020),LINC02731(dist=64456)	intergenic	opensea	0.100362	0.022537	Hypermethylated
cg13067566	chr8		IGR	CASC9(dist=51530),HNF4G(dist=77230)	intergenic	opensea	0.126936	0.0226219	Hypermethylated
cg14029849	chr11	DLG2	Body	DLG2	intronic	opensea	0.213827	0.0226634	Hypermethylated
cg13665060	chr2		IGR	UXS1(dist=148706),LOC402096(dist=26700)	intergenic	Island	0.133893	0.0228975	Hypermethylated
cg22821947	chr11		IGR	IGSF9B(dist=10710),LINC02731(dist=64766)	intergenic	opensea	0.102725	0.022907	Hypermethylated
cg16202419	chr5		IGR	FGF10-AS1(dist=69109),LINC02224(dist=12046)	intergenic	opensea	-0.141624	0.0229088	Hypomethylated
cg04004158	chr16		IGR	C1QTNF8(dist=6230),CACNA1H(dist=50632)	intergenic	Island	0.258562	0.0229977	Hypermethylated
cg24419520	chr2		IGR	UXS1(dist=148462),LOC402096(dist=26944)	intergenic	Island	0.150051	0.0230467	Hypermethylated
cg03256335	chr5		IGR	LOC101928505(dist=193013),LINC02225(dist=26329)	intergenic	opensea	0.131385	0.0230598	Hypermethylated
cg15178560	chr4		IGR	LINC02267	ncRNA_intronic	opensea	0.137023	0.0230664	Hypermethylated
cg09243852	chr7	C7orf50	Body	C7orf50	intronic	S_Shelf	0.124603	0.0230674	Hypermethylated
cg14505896	chr4	TRIM2	Body	TRIM2	intronic	opensea	-0.296745	0.0231085	Hypomethylated
cg11406870	chr12		IGR	LINC02370(dist=208221),LINC02414(dist=70142)	intergenic	opensea	0.161054	0.0231219	Hypermethylated
cg17520000	chr10	AKR1CL1	Body	AKR1C8P	ncRNA_intronic	opensea	0.179418	0.023156	Hypermethylated
cg07813134	chr12		IGR	MUCL1(dist=77028),TESPA1(dist=12601)	intergenic	opensea	0.244947	0.0231707	Hypermethylated
cg26967566	chr16	C16orf74	Body	C16orf74	exonic	Island	0.102421	0.0231904	Hypermethylated
cg21496060	chr6	SMOC2	Body	SMOC2	intronic	N_Shore	0.123651	0.0232091	Hypermethylated
cg08951301	chr12		IGR	AEBP2(dist=189999),LINC02398(dist=302459)	intergenic	opensea	0.161258	0.0232416	Hypermethylated
cg26740007	chr12	NELL2	Body	NELL2	intronic	opensea	0.105287	0.0232811	Hypermethylated
cg25053018	chr2		IGR	PDK1(dist=4598),NONE(dist=NONE)	intergenic	opensea	0.139198	0.0233703	Hypermethylated
cg13172732	chr17	NXN	TSS1500	NXN	intronic	opensea	-0.251732	0.0234246	Hypomethylated
cg20385461	chr2	RBMS1	Body	RBMS1	intronic	opensea	0.10604	0.0235906	Hypermethylated
cg14615547	chr11		IGR	TRPC6(dist=103008),ANGPTL5(dist=203659)	intergenic	opensea	0.197359	0.0237939	Hypermethylated
cg22011303	chr2		IGR	QPCT(dist=177452),CDC42EP3(dist=91170)	intergenic	opensea	0.11088	0.0238089	Hypermethylated
cg25720366	chr18	FHOD3	Body	FHOD3	intronic	opensea	0.114354	0.023831	Hypermethylated
cg17417449	chr12		IGR	DCD(dist=181754),MUCL1(dist=24397)	intergenic	opensea	0.132411	0.0238934	Hypermethylated
cg09237454	chr7	MLL3	Body	KMT2C	intronic	Island	0.113296	0.0239184	Hypermethylated
cg22367872	chr1	AJAP1	Body	AJAP1	intronic	S_Shelf	0.141149	0.0239916	Hypermethylated
cg13168117	chr2	KLHL30	5'UTR	KLHL30	intronic	N_Shore	0.136915	0.0240303	Hypermethylated
cg23184372	chr12		IGR	LOC100506691	ncRNA_intronic	opensea	0.154187	0.0240464	Hypermethylated
cg13873758	chr2		IGR	LINC01865	ncRNA_intronic	S_Shelf	0.119496	0.0240809	Hypermethylated
cg26311420	chr6		IGR	DACT2(dist=92112),SMOC2(dist=29295)	intergenic	Island	0.156143	0.02413	Hypermethylated
cg18561247	chr6	RPS6KA2	Body	RPS6KA2	intronic	S_Shore	0.159416	0.0241668	Hypermethylated
cg06066303	chr11	MS4A5	5'UTR	MS4A5	UTR5	opensea	0.104876	0.0241891	Hypermethylated
cg02728276	chr3		IGR	BCHE(dist=175380),LOC105374194(dist=885880)	intergenic	opensea	0.137297	0.0241913	Hypermethylated
cg06691943	chr6	BACH2	Body	BACH2	exonic	opensea	0.162197	0.0243337	Hypermethylated
cg05881163	chr2		IGR	SNTG2(dist=6058),TPO(dist=39791)	intergenic	opensea	0.144911	0.0244256	Hypermethylated
cg16113156	chr18		IGR	LINC01029(dist=560582),SALL3(dist=474010)	intergenic	Island	0.132245	0.0244269	Hypermethylated
cg24299301	chr19	JSRP1	TSS200	JSRP1(dist=54)	upstream	S_Shelf	0.146695	0.0245074	Hypermethylated
cg06381480	chr20	NFATC2	Body	NFATC2	exonic	opensea	0.115812	0.0245109	Hypermethylated
cg17841545	chr10	NRAP	Body	NRAP	intronic	opensea	0.110899	0.0245515	Hypermethylated
cg01164791	chr10		IGR	MGMT(dist=6649),EBF3(dist=57601)	intergenic	N_Shore	0.112225	0.0246262	Hypermethylated
cg02385501	chr1	CHRM3	5'UTR	CHRM3	intronic	opensea	0.122056	0.0248014	Hypermethylated
cg04704964	chr12	LOC643711	Body	LOC643711	ncRNA_intronic	opensea	0.128531	0.024841	Hypermethylated
cg03350683	chr6		IGR	RNF217(dist=34325),TPD52L1(dist=26814)	intergenic	opensea	-0.173018	0.0249278	Hypomethylated
cg18647768	chr5		IGR	NNT(dist=112510),FGF10(dist=480346)	intergenic	opensea	0.149723	0.0249683	Hypermethylated
cg02307075	chr2	PLEKHM3	3'UTR	PLEKHM3	UTR3	opensea	0.105492	0.0249802	Hypermethylated
cg09471887	chr6	BACH2	Body	BACH2	exonic	opensea	0.142064	0.0250226	Hypermethylated
cg18081501	chr17	RNF126P1	TSS1500	RNF126P1(dist=875)	upstream	N_Shore	-0.131405	0.02514	Hypomethylated
cg21819129	chr8	DLGAP2	Body	DLGAP2	intronic	Island	0.127904	0.0251452	Hypermethylated
cg00661096	chr11		IGR	LINC02737(dist=764881),CNTN5(dist=1878884)	intergenic	opensea	0.127626	0.0251788	Hypermethylated
cg14219693	chr10		IGR	CYP2C8(dist=98822),ACSM6(dist=25881)	intergenic	opensea	0.133733	0.0252685	Hypermethylated
cg16218494	chr11		IGR	ABTB2(dist=47194),CAT(dist=33730)	intergenic	opensea	0.190085	0.0252854	Hypermethylated
cg00276091	chr12		IGR	LOC100506691	ncRNA_intronic	opensea	0.170749	0.0253177	Hypermethylated
cg08165143	chr11		IGR	MRPL17(dist=22999),GVINP1(dist=6806)	intergenic	opensea	0.159594	0.0253679	Hypermethylated
cg14898822	chr15	WHAMM	1stExon	WHAMM	exonic	Island	0.114659	0.0253834	Hypermethylated
cg07470207	chr8		IGR	ADCY8(dist=775591),EFR3A(dist=87594)	intergenic	opensea	0.124633	0.0254418	Hypermethylated
cg08900468	chr3		IGR	DIPK2A(dist=1922316),LNCSRLR(dist=150605)	intergenic	opensea	0.108351	0.0256191	Hypermethylated
cg08884362	chr6	LOC643623	Body	LINC02523	ncRNA_intronic	opensea	0.115218	0.0257022	Hypermethylated
cg20587196	chr4	GAK	Body	GAK	intronic	opensea	0.199799	0.0258606	Hypermethylated
cg10658510	chr3		IGR	SATB1-AS1(dist=426025),KCNH8(dist=192371)	intergenic	opensea	0.152882	0.0258847	Hypermethylated
cg10717312	chr2	SNED1	Body	SNED1	exonic	Island	0.130046	0.0259157	Hypermethylated
cg24015747	chr19	FSD1	Body	FSD1	exonic	Island	0.104321	0.02596	Hypermethylated
cg13920856	chr2	TANC1	5'UTR	TANC1	intronic	opensea	-0.359213	0.0259962	Hypomethylated
cg03583975	chr11	DLG2	Body	DLG2	intronic	opensea	0.217328	0.0263042	Hypermethylated
cg27603049	chr3		IGR	SATB1-AS1(dist=416639),KCNH8(dist=201757)	intergenic	opensea	0.14819	0.0263551	Hypermethylated
cg26847392	chr11	OR5F1	TSS1500	OR5F1(dist=634)	upstream	opensea	0.132701	0.0264386	Hypermethylated
cg12219838	chr6	RIPK1	Body	RIPK1	exonic	opensea	0.125539	0.0265348	Hypermethylated
cg05356163	chr6	BACH2	Body	BACH2	exonic	opensea	0.159594	0.026572	Hypermethylated
cg25137484	chr11	DYNC2H1	Body	DYNC2H1	intronic	opensea	0.143588	0.0266284	Hypermethylated
cg04392133	chr4		IGR	FRG1-DT	ncRNA_intronic	N_Shore	0.256493	0.0266291	Hypermethylated
cg23064996	chr4		IGR	LINC02173(dist=237266),DKK2(dist=231089)	intergenic	opensea	0.199051	0.0267726	Hypermethylated
cg03532037	chr2		IGR	UXS1(dist=148410),LOC402096(dist=26996)	intergenic	Island	0.136942	0.0268892	Hypermethylated
cg24066883	chr1		IGR	CLCA4-AS1	ncRNA_intronic	opensea	0.168029	0.0269104	Hypermethylated
cg12708181	chr6		IGR	MCUR1(dist=49698),RNF182(dist=60187)	intergenic	opensea	0.153994	0.02696	Hypermethylated
cg27155243	chr4	ENPP6	Body	ENPP6	intronic	opensea	0.107478	0.0269947	Hypermethylated
cg12058478	chr1	AJAP1	Body	AJAP1	intronic	S_Shore	0.106312	0.0270862	Hypermethylated
cg11324379	chr19		IGR	LINC01791	ncRNA_intronic	opensea	0.118695	0.0271678	Hypermethylated
cg13175746	chr12		IGR	RESF1(dist=90585),BICD1(dist=23115)	intergenic	opensea	0.155125	0.0272979	Hypermethylated
cg04812521	chr8		IGR	CSMD3(dist=1785811),TRPS1(dist=185745)	intergenic	opensea	0.111321	0.0276708	Hypermethylated
cg13279192	chr6	RIPK1	Body	RIPK1	splicing	opensea	0.157464	0.0277332	Hypermethylated
cg04628369	chr20	PMEPA1	5'UTR	PMEPA1	intronic	Island	0.126838	0.027822	Hypermethylated
cg25809561	chr17	MYO1D	Body	MYO1D	intronic	Island	0.154834	0.0278888	Hypermethylated
cg18192667	chr12		IGR	KCNA5(dist=153993),LINC02443(dist=33215)	intergenic	opensea	0.105134	0.0279476	Hypermethylated
cg27452156	chr2		IGR	SLC8A1-AS1	ncRNA_intronic	opensea	0.12073	0.0280221	Hypermethylated
cg22805078	chr12		IGR	DCD(dist=181612),MUCL1(dist=24539)	intergenic	opensea	0.165763	0.0280421	Hypermethylated
cg06065346	chr2		IGR	LINC01320(dist=313302),MIR548AD(dist=435539)	intergenic	opensea	0.118225	0.028129	Hypermethylated
cg24494556	chr10	ZNF33B	TSS200	ZNF33B(dist=82)	upstream	Island	0.112667	0.0281856	Hypermethylated
cg06258648	chr8	VPS13B	Body	VPS13B	intronic	opensea	0.10849	0.0282515	Hypermethylated
cg20191103	chr17		IGR	LINC01497(dist=2003),LINC01028(dist=65724)	intergenic	opensea	0.102784	0.0282811	Hypermethylated
cg14560339	chr18	KIAA0802	Body	MTCL1	exonic	N_Shore	0.11262	0.0283906	Hypermethylated
cg13041518	chr20		IGR	BTBD3(dist=432328),LINC01722(dist=506281)	intergenic	opensea	0.111857	0.0284123	Hypermethylated
cg16844292	chr7	NCRNA00174	Body	LINC00174	ncRNA_exonic	N_Shore	0.248928	0.0284392	Hypermethylated
cg09606343	chr8		IGR	ANGPT1(dist=101769),RSPO2(dist=299629)	intergenic	opensea	0.135992	0.0284513	Hypermethylated
cg10570102	chr1		IGR	TTC34(dist=15022),ACTRT2(dist=205576)	intergenic	opensea	0.154457	0.0285616	Hypermethylated
cg23152235	chr11		IGR	IGSF9B(dist=10574),LINC02731(dist=64902)	intergenic	opensea	0.112691	0.0285728	Hypermethylated
cg23866403	chr19	LGI4	Body	LGI4	exonic	S_Shore	0.123675	0.0285817	Hypermethylated
cg23387237	chr21	MRAP	ExonBnd	MRAP	splicing	N_Shore	0.107971	0.0286246	Hypermethylated
cg16771467	chr18	ATP8B1	Body	ATP8B1	exonic	Island	0.116479	0.0287477	Hypermethylated
cg09981198	chr6		IGR	LOC100506207(dist=1531153),TFAP2A(dist=80079)	intergenic	N_Shelf	0.107779	0.0288348	Hypermethylated
cg18014864	chr3		IGR	SGO1(dist=93859),LOC101927829(dist=62376)	intergenic	opensea	0.10823	0.0288551	Hypermethylated
cg01617876	chr21		IGR	CHODL-AS1(dist=15566),CHODL(dist=16166)	intergenic	opensea	-0.208646	0.0288897	Hypomethylated
cg17629906	chr12	LRTM2	Body	LRTM2	exonic	opensea	0.10687	0.0289125	Hypermethylated
cg09782508	chr21	KCNJ6	Body	KCNJ6	intronic	opensea	-0.207871	0.0289569	Hypomethylated
cg10466468	chr3		IGR	MIR8060(dist=250207),EPHA6(dist=204348)	intergenic	opensea	0.152583	0.0289688	Hypermethylated
cg16776421	chr16	RAB11FIP3	Body	RAB11FIP3	exonic	opensea	0.103454	0.0289956	Hypermethylated
cg14478255	chr2	TPO	Body	TPO	intronic	opensea	0.147537	0.0290046	Hypermethylated
cg20733761	chr21	PCBP3	Body	PCBP3	intronic	Island	0.101991	0.0290497	Hypermethylated
cg01684721	chr14		IGR	LINC01148(dist=310774),LINC02330(dist=400850)	intergenic	opensea	0.107821	0.029091	Hypermethylated
cg17327126	chr6		IGR	BCKDHB(dist=396775),TENT5A(dist=1002685)	intergenic	opensea	0.190883	0.0291426	Hypermethylated
cg12117135	chr12		IGR	RIMBP2(dist=71168),STX2(dist=2127)	intergenic	opensea	0.202325	0.0291643	Hypermethylated
cg25113986	chr7		IGR	GIMAP1-GIMAP5(dist=22248),TMEM176B(dist=25391)	intergenic	opensea	-0.350362	0.0292267	Hypomethylated
cg09642381	chr3	XYLB	3'UTR	XYLB	UTR3	opensea	0.188883	0.0292356	Hypermethylated
cg17398613	chr21	SLC37A1	5'UTR	SLC37A1	UTR5	S_Shelf	-0.11217	0.0293276	Hypomethylated
cg08717611	chr11	OR4C3	TSS1500	OR4C3(dist=764)	upstream	opensea	0.109205	0.0293555	Hypermethylated
cg19697795	chr8		IGR	DLGAP2	intronic	N_Shore	0.125346	0.0293931	Hypermethylated
cg07731030	chr4		IGR	WDFY3-AS2(dist=90377),ARHGAP24(dist=376030)	intergenic	opensea	0.107693	0.0295101	Hypermethylated
cg09508362	chr2		IGR	SNTG2(dist=6372),TPO(dist=39477)	intergenic	opensea	0.124484	0.029575	Hypermethylated
cg01169559	chr10		IGR	DIP2C(dist=95639),LARP4B(dist=21607)	intergenic	opensea	0.145961	0.02962	Hypermethylated
cg06699195	chr2		IGR	LINC01115	ncRNA_exonic	N_Shore	-0.121545	0.029697	Hypomethylated
cg10630833	chr3		IGR	HTR1F	intronic	opensea	0.107783	0.0297909	Hypermethylated
cg11686901	chr19	ELAVL3	Body	ELAVL3	exonic	Island	0.102608	0.0303849	Hypermethylated
cg03277898	chr7		IGR	GRIFIN(dist=2807),LFNG(dist=33339)	intergenic	opensea	0.15772	0.0303902	Hypermethylated
cg20993909	chr8		IGR	DLGAP2	intronic	S_Shore	0.153682	0.0303935	Hypermethylated
cg08093959	chr2		IGR	UXS1(dist=149058),LOC402096(dist=26348)	intergenic	S_Shore	0.183995	0.0304024	Hypermethylated
cg04994519	chr12	PCED1B-AS1	TSS1500	PCED1B	intronic	opensea	0.119849	0.0306398	Hypermethylated
cg17725512	chr10	CYP2C18	Body	CYP2C18	intronic	opensea	0.149026	0.0306581	Hypermethylated
cg22068879	chr8	MTMR7	Body	MTMR7,VPS37A	intronic	opensea	0.110673	0.0306889	Hypermethylated
cg22682297	chr6		IGR	PRIM2(dist=459345),GUSBP4(dist=262110)	intergenic	opensea	-0.113621	0.0306918	Hypomethylated
cg05872609	chr4	STOX2	Body	STOX2	exonic	opensea	0.116927	0.0307473	Hypermethylated
cg00082558	chr10		IGR	CYP2C8(dist=99839),ACSM6(dist=24864)	intergenic	opensea	0.152317	0.0307744	Hypermethylated
cg16538953	chr22	TPTEP1	Body	TPTEP1	ncRNA_intronic	N_Shore	0.10455	0.0308163	Hypermethylated
cg22816857	chr19	ELAVL3	Body	ELAVL3	exonic	Island	0.100109	0.0308734	Hypermethylated
cg10900663	chr14		IGR	SYNDIG1L(dist=49631),NPC2(dist=4094)	intergenic	opensea	0.101305	0.030894	Hypermethylated
cg09062961	chr2	SNTG2	Body	SNTG2	intronic	opensea	0.156397	0.0309033	Hypermethylated
cg24918184	chr19	FSD1	Body	FSD1	exonic	Island	0.121622	0.0309162	Hypermethylated
cg01393536	chr22		IGR	LINC02554(dist=256252),MN1(dist=174212)	intergenic	opensea	0.11326	0.0309448	Hypermethylated
cg01977055	chr17	LOC101927239	Body	LINC01989	ncRNA_intronic	opensea	0.104855	0.0310216	Hypermethylated
cg17910918	chr1		IGR	LEPR(dist=10685),PDE4B(dist=144332)	intergenic	opensea	0.103969	0.0310997	Hypermethylated
cg07577121	chr3		IGR	MIR466(dist=3777),STT3B(dist=367361)	intergenic	opensea	-0.146276	0.0311439	Hypomethylated
cg21923870	chr5		IGR	SPINK6(dist=22224),MARCOL(dist=1164)	intergenic	opensea	0.110655	0.0311449	Hypermethylated
cg01303183	chr16	C16orf68	TSS1500	METTL22(dist=762)	upstream	N_Shore	0.124745	0.0312055	Hypermethylated
cg11957623	chr2		IGR	NCAPH(dist=47477),NEURL3(dist=73077)	intergenic	opensea	0.176048	0.0312609	Hypermethylated
cg05628349	chr12		IGR	LOC105370068(dist=220283),LINC02393(dist=5746)	intergenic	opensea	0.115134	0.0312762	Hypermethylated
cg10144751	chr16	IFT140	Body	IFT140	intronic	opensea	0.371761	0.0313342	Hypermethylated
cg27464615	chr5	AHRR	Body	AHRR	intronic	N_Shore	0.192938	0.0313549	Hypermethylated
cg14819374	chr5		IGR	GABRG2(dist=468617),CCNG1(dist=813415)	intergenic	opensea	0.100531	0.0313949	Hypermethylated
cg23592392	chr12		IGR	TMEM132D(dist=45842),LINC02418(dist=83945)	intergenic	opensea	0.137534	0.0314591	Hypermethylated
cg01128736	chr6		IGR	LOC102724096(dist=270895),LINC02533(dist=27874)	intergenic	opensea	0.138738	0.0314647	Hypermethylated
cg07940611	chr2	SH3BP4	5'UTR	SH3BP4	intronic	opensea	0.11793	0.0314974	Hypermethylated
cg21784143	chr17		IGR	KRT16P3(dist=52777),CDRT15L2(dist=22449)	intergenic	opensea	0.127635	0.0316789	Hypermethylated
cg10955202	chr16		IGR	LINC2194	ncRNA_intronic	opensea	0.114309	0.0317806	Hypermethylated
cg24008238	chr6	MLLT4	Body	AFDN	exonic	opensea	0.107931	0.0318287	Hypermethylated
cg13598834	chr3		IGR	MIR8060(dist=249419),EPHA6(dist=205136)	intergenic	opensea	0.105081	0.0318707	Hypermethylated
cg11595571	chr18		IGR	CEP192(dist=5668),LDLRAD4(dist=88056)	intergenic	opensea	0.117918	0.03193	Hypermethylated
cg06879560	chr11	OR52B6	TSS1500	OR52B6(dist=275)	upstream	opensea	0.158681	0.0319471	Hypermethylated
cg04793358	chr6		IGR	UTRN(dist=68581),EPM2A(dist=703690)	intergenic	opensea	0.121211	0.0320271	Hypermethylated
cg12967327	chr17	RTN4RL1	Body	RTN4RL1	intronic	S_Shelf	0.176285	0.0321468	Hypermethylated
cg15097580	chr18		IGR	CCBE1(dist=124672),PMAIP1(dist=77901)	intergenic	opensea	-0.143464	0.0321912	Hypomethylated
cg12187761	chr8	VPS13B	Body	VPS13B	intronic	opensea	0.124883	0.0321978	Hypermethylated
cg19100988	chr5		IGR	NNT(dist=23570),FGF10(dist=569286)	intergenic	opensea	0.143061	0.0322204	Hypermethylated
cg27168844	chr6	IL17A	Body	IL17A	intronic	opensea	0.132102	0.0322585	Hypermethylated
cg25812043	chr9	PNPLA7	Body	PNPLA7	intronic	Island	0.105098	0.0322641	Hypermethylated
cg18668308	chr12	WSB2	Body	WSB2	intronic	opensea	0.110122	0.0322926	Hypermethylated
cg24089603	chr11		IGR	C11orf74(dist=743275),LINC02760(dist=536035)	intergenic	opensea	0.116605	0.0322978	Hypermethylated
cg04122494	chr12		IGR	SLCO1B3-SLCO1B7	intronic	opensea	0.226001	0.0323879	Hypermethylated
cg21243750	chr9	FREM1	5'UTR	FREM1	intronic	opensea	0.238898	0.0324066	Hypermethylated
cg06184522	chr2		IGR	CXCR4(dist=3236),THSD7B(dist=644160)	intergenic	S_Shore	-0.264519	0.0324449	Hypomethylated
cg01604429	chr11		IGR	MRGPRX4(dist=12872),SLC25A51P4(dist=21986)	intergenic	N_Shelf	0.103422	0.0325823	Hypermethylated
cg24886725	chr22		IGR	LINC02554(dist=255819),MN1(dist=174645)	intergenic	opensea	0.227432	0.032671	Hypermethylated
cg08344524	chr15		IGR	PRTG(dist=56271),NEDD4(dist=27496)	intergenic	opensea	-0.101362	0.0326794	Hypomethylated
cg00841692	chr10		IGR	ZNF248	intronic	N_Shelf	0.1257	0.0326937	Hypermethylated
cg01289128	chr4		IGR	LINC02483(dist=38474),RCHY1(dist=77997)	intergenic	opensea	0.102931	0.0327064	Hypermethylated
cg02395235	chr5		IGR	MARCOL(dist=21)	upstream	opensea	0.126222	0.0327077	Hypermethylated
cg06592333	chr7	GPR37	Body	GPR37	exonic	opensea	0.147211	0.0327633	Hypermethylated
cg15769431	chr2		IGR	TMEM17(dist=98743),EHBP1(dist=68940)	intergenic	opensea	0.119486	0.0328016	Hypermethylated
cg14543179	chr22		IGR	PLA2G3(dist=17434),MIR3928(dist=2120)	intergenic	N_Shelf	0.148371	0.0328691	Hypermethylated
cg17431280	chr19	GRLF1	3'UTR	ARHGAP35	UTR3	Island	0.131146	0.0329459	Hypermethylated
cg02331655	chr18		IGR	LINC01029(dist=1005497),SALL3(dist=29095)	intergenic	opensea	0.114123	0.0330469	Hypermethylated
cg24828322	chr10	CYP2C8	TSS1500	CYP2C8(dist=857)	upstream	opensea	0.129605	0.0330595	Hypermethylated
cg00923230	chr9		IGR	DCAF12(dist=7920),UBAP1(dist=44387)	intergenic	Island	0.168262	0.0330703	Hypermethylated
cg17127309	chr10	RET	Body	RET	intronic	N_Shore	0.16648	0.0332052	Hypermethylated
cg09872582	chr1		IGR	SPRR3(dist=9169),SPRR1B(dist=18178)	intergenic	opensea	0.109488	0.0332641	Hypermethylated
cg07913744	chr12		IGR	TMTC2(dist=439001),SLC6A15(dist=1285625)	intergenic	opensea	0.177755	0.0333458	Hypermethylated
cg22187085	chr20		IGR	LINC01713(dist=199)	upstream	opensea	0.105774	0.0333704	Hypermethylated
cg19017278	chr7	C7orf50	Body	C7orf50	intronic	S_Shelf	0.10618	0.0333737	Hypermethylated
cg22569419	chr12	SLC2A13	Body	SLC2A13	intronic	opensea	0.10061	0.03356	Hypermethylated
cg13350140	chr10	RET	Body	RET	intronic	N_Shore	0.188272	0.0336894	Hypermethylated
cg12233833	chr10		IGR	DIP2C(dist=95217),LARP4B(dist=22029)	intergenic	opensea	0.15481	0.0337712	Hypermethylated
cg11443602	chr14		IGR	LINC00648(dist=604100),RPS29(dist=1169389)	intergenic	opensea	0.102593	0.0337927	Hypermethylated
cg17630127	chr11	MS4A5	TSS1500	MS4A5(dist=267)	upstream	opensea	0.10476	0.0338246	Hypermethylated
cg20197516	chr17	C17orf101	Body	OGFOD3	exonic	Island	0.125058	0.0338417	Hypermethylated
cg07675221	chr17	ABR	Body	ABR	intronic	opensea	0.126651	0.0338577	Hypermethylated
cg03019702	chr3		IGR	OTOL1(dist=1214937),LINC01192(dist=458364)	intergenic	opensea	0.111768	0.0338812	Hypermethylated
cg00421356	chr2	NGEF	5'UTR	NGEF	intronic	opensea	0.104835	0.0338913	Hypermethylated
cg13756965	chr11	SHANK2	5'UTR	SHANK2	intronic	opensea	0.107225	0.0339463	Hypermethylated
cg20579173	chr12		IGR	LOC100506691	ncRNA_intronic	opensea	0.162278	0.0339709	Hypermethylated
cg11284599	chr22	PICK1	TSS1500	POLR2F(dist=13859),PICK1(dist=1481)	intergenic	N_Shore	0.113842	0.0340303	Hypermethylated
cg09997203	chr19		IGR	MIMT1(dist=262620),USP29(dist=8965)	intergenic	opensea	0.101731	0.0340942	Hypermethylated
cg16677969	chr10		IGR	LINC02650(dist=240714),GHITM(dist=221706)	intergenic	opensea	0.116273	0.0341551	Hypermethylated
cg20570313	chr11	MRGPRF	Body	MRGPRF	exonic	Island	0.172609	0.0342229	Hypermethylated
cg01971224	chr1	CELSR2	Body	CELSR2	exonic	Island	0.121276	0.034251	Hypermethylated
cg14949231	chr4	STOX2	Body	STOX2	exonic	opensea	0.104752	0.034284	Hypermethylated
cg16751193	chr4		IGR	ARSJ(dist=201061),UGT8(dist=417694)	intergenic	opensea	0.128586	0.0343417	Hypermethylated
cg14055195	chr3		IGR	DCBLD2(dist=392923),COL8A1(dist=343976)	intergenic	opensea	0.123878	0.0345211	Hypermethylated
cg08933790	chr16	WFIKKN1	3'UTR	WFIKKN1	UTR3	Island	0.169518	0.0345655	Hypermethylated
cg00230346	chr6		IGR	CD109(dist=96071),LOC101928516(dist=145055)	intergenic	opensea	0.122008	0.0346783	Hypermethylated
cg07012076	chr11	OR5AS1	TSS1500	OR5AS1(dist=269)	upstream	opensea	0.128107	0.0347919	Hypermethylated
cg02250448	chr7	POU6F2	Body	POU6F2	intronic	opensea	-0.17703	0.0348179	Hypomethylated
cg27012707	chr7		IGR	ACTR3B(dist=258231),LINC01287(dist=286309)	intergenic	opensea	0.127979	0.0348312	Hypermethylated
cg15913666	chr16	IFT140	Body	IFT140	intronic	opensea	0.156309	0.0348834	Hypermethylated
cg14118949	chr18		IGR	ZNF24(dist=10920),ZNF396(dist=11355)	intergenic	opensea	0.101454	0.0349618	Hypermethylated
cg03660948	chr16	AXIN1	Body	AXIN1	intronic	N_Shore	0.165501	0.0351331	Hypermethylated
cg06790053	chr1		IGR	SCCPDH(dist=8014),LINC01341(dist=13466)	intergenic	opensea	0.121479	0.0351778	Hypermethylated
cg20602055	chr8	RALYL	Body	RALYL	intronic	opensea	0.110634	0.0352361	Hypermethylated
cg00937982	chr21	SIM2	Body	SIM2	intronic	Island	-0.162864	0.0352975	Hypomethylated
cg25899315	chr5	LOC101927078	Body	LOC101927078	ncRNA_intronic	opensea	0.142464	0.0353301	Hypermethylated
cg14635160	chr9		IGR	LINC01507	ncRNA_intronic	opensea	-0.149164	0.0353412	Hypomethylated
cg18594701	chr11	OR4A16	1stExon	OR4A16	exonic	opensea	0.104172	0.0353804	Hypermethylated
cg10989444	chr6		IGR	BCKDHB(dist=264739),TENT5A(dist=1134721)	intergenic	opensea	0.202593	0.0354253	Hypermethylated
cg25985031	chr15		IGR	FOXB1(dist=197305),ANXA2(dist=142403)	intergenic	opensea	0.112651	0.035427	Hypermethylated
cg00402350	chr5		IGR	KCTD16(dist=963515),PRELID2(dist=307143)	intergenic	opensea	0.110669	0.0355189	Hypermethylated
cg08741833	chr4		IGR	FRG1-DT	ncRNA_intronic	S_Shore	0.106557	0.0355474	Hypermethylated
cg03921106	chr11	DLG2	Body	DLG2	intronic	opensea	0.126426	0.0355539	Hypermethylated
cg09665371	chr10		IGR	CELF2-DT(dist=825)	downstream	opensea	0.149989	0.0357071	Hypermethylated
cg00121676	chr12		IGR	DCD(dist=111905),MUCL1(dist=94246)	intergenic	opensea	0.100552	0.0357206	Hypermethylated
cg04980928	chr12	LRTM2	Body	LRTM2	exonic	opensea	0.110213	0.0357358	Hypermethylated
cg00625436	chr11		IGR	EHF(dist=22127),APIP(dist=196882)	intergenic	opensea	0.119177	0.0357892	Hypermethylated
cg18158464	chr16		IGR	WWOX(dist=74593),MAF(dist=306578)	intergenic	opensea	-0.113407	0.0357906	Hypomethylated
cg17981339	chr12	MUCL1	TSS1500	MUCL1(dist=981)	upstream	opensea	0.124605	0.0358544	Hypermethylated
cg07095737	chr16		IGR	LINC02130	ncRNA_intronic	opensea	0.227413	0.0358616	Hypermethylated
cg23930554	chr1		IGR	TTC34(dist=15628),ACTRT2(dist=204970)	intergenic	opensea	0.163784	0.0358836	Hypermethylated
cg24943761	chr12	OR6C3	TSS200	OR6C3(dist=6)	upstream	opensea	0.167311	0.0358995	Hypermethylated
cg20880144	chr2		IGR	SNTG2(dist=6434),TPO(dist=39415)	intergenic	opensea	0.150136	0.0360674	Hypermethylated
cg01045337	chr16	AXIN1	Body	AXIN1	intronic	Island	0.170266	0.0360925	Hypermethylated
cg03369084	chr12	OR9K2	TSS1500	OR9K2(dist=317)	upstream	opensea	0.104771	0.0361224	Hypermethylated
cg12393324	chr6	COL21A1	Body	COL21A1	intronic	opensea	0.104932	0.0363017	Hypermethylated
cg03641478	chr6	BACH2	Body	BACH2	intronic	opensea	0.14838	0.0364413	Hypermethylated
cg07641530	chr1		IGR	TNR(dist=83331),LINC01657(dist=50417)	intergenic	opensea	0.100235	0.0364893	Hypermethylated
cg13740669	chr4	KCNIP4	Body	KCNIP4	intronic	opensea	0.109839	0.0364982	Hypermethylated
cg18478565	chr1	DNAH14	5'UTR	DNAH14	intronic	opensea	0.191765	0.0365263	Hypermethylated
cg08881206	chr19	JSRP1	TSS1500	JSRP1(dist=747)	upstream	S_Shelf	0.115505	0.0365816	Hypermethylated
cg05987686	chr11	OR5AS1	TSS1500	OR5AS1(dist=705)	upstream	opensea	0.11685	0.0366028	Hypermethylated
cg18952026	chr12	LRTM2	Body	LRTM2	exonic	opensea	0.113805	0.0366692	Hypermethylated
cg09160681	chr4		IGR	LINC02562(dist=84488),LINC02483(dist=184880)	intergenic	opensea	0.125638	0.0367258	Hypermethylated
cg18484114	chr11		IGR	GLYAT(dist=11203),GLYATL2(dist=90890)	intergenic	opensea	0.117834	0.0367795	Hypermethylated
cg11753499	chr11	H19	TSS200	H19	ncRNA_exonic	N_Shore	0.110514	0.0368618	Hypermethylated
cg01645921	chr7	NCAPG2	Body	NCAPG2	intronic	opensea	-0.144216	0.0371391	Hypomethylated
cg22839476	chr10	EBF3	Body	EBF3	intronic	S_Shore	-0.182442	0.0371661	Hypomethylated
cg12042864	chr7		IGR	ATP5MF-PTCD1(dist=2470),ZNF789(dist=4253)	intergenic	S_Shelf	0.135928	0.0371781	Hypermethylated
cg06138941	chr3		IGR	LINC02077(dist=273495),ROBO1(dist=274779)	intergenic	opensea	0.120706	0.0372061	Hypermethylated
cg12646307	chr18	TCF4	Body	TCF4	intronic	opensea	0.114968	0.0372854	Hypermethylated
cg18168746	chr4		IGR	LINC02380(dist=254046),LINC02494(dist=804482)	intergenic	opensea	0.212618	0.0374255	Hypermethylated
cg16947633	chr1		IGR	LINC01750(dist=198087),CTTNBP2NL(dist=199286)	intergenic	opensea	0.108935	0.0374954	Hypermethylated
cg20028661	chr7	C7orf50	Body	C7orf50	intronic	opensea	0.167845	0.0375223	Hypermethylated
cg19454755	chr12		IGR	SYT10(dist=312728),ALG10(dist=269949)	intergenic	opensea	0.143079	0.0375559	Hypermethylated
cg10278699	chr6	BACH2	Body	BACH2	exonic	opensea	0.151436	0.0377744	Hypermethylated
cg07241675	chr7		IGR	ATP5MF-PTCD1(dist=3353),ZNF789(dist=3370)	intergenic	N_Shelf	0.154346	0.0377947	Hypermethylated
cg19866594	chr8	KCNB2	Body	KCNB2	exonic	opensea	0.117646	0.0378279	Hypermethylated
cg13102348	chr15		IGR	SPATA8(dist=300376),LINC02254(dist=284380)	intergenic	opensea	0.116031	0.0378969	Hypermethylated
cg01001241	chr11	ZDHHC5	Body	ZDHHC5	intronic	opensea	-0.166225	0.0380745	Hypomethylated
cg22134024	chr6	MIR7641-2	TSS1500	LOC102724096(dist=237754),LINC02533(dist=61015)	intergenic	opensea	0.115044	0.0380793	Hypermethylated
cg19601398	chr8		IGR	SIRLNT(dist=99866),ZMAT4(dist=87363)	intergenic	opensea	0.191113	0.038084	Hypermethylated
cg14261943	chr6	ZNF311	5'UTR	ZNF311	intronic	opensea	0.149406	0.0381741	Hypermethylated
cg05461143	chr7		IGR	GIMAP7(dist=14045),GIMAP4(dist=32252)	intergenic	opensea	0.115851	0.0382175	Hypermethylated
cg25097273	chr4		IGR	MRPL1(dist=7007),FRAS1(dist=97531)	intergenic	opensea	0.107585	0.0383083	Hypermethylated
cg24209115	chr17	SLC5A10	Body	SLC5A10	exonic	Island	0.151687	0.0383216	Hypermethylated
cg09051913	chr6		IGR	SLC22A1(dist=4955),SLC22A2(dist=53082)	intergenic	opensea	0.122931	0.0383572	Hypermethylated
cg02165693	chr11	SLC22A9	3'UTR	SLC22A9	UTR3	opensea	0.128529	0.0383602	Hypermethylated
cg00575003	chr1	ESRRG	5'UTR	ESRRG	intronic	N_Shore	0.114493	0.0383873	Hypermethylated
cg06904507	chr4		IGR	LINC02173(dist=237219),DKK2(dist=231136)	intergenic	opensea	0.146311	0.0384303	Hypermethylated
cg07638338	chr3		IGR	CSNKA2IP(dist=174017),EPHA3(dist=466010)	intergenic	opensea	0.164491	0.0384331	Hypermethylated
cg06586713	chr7	PCLO	Body	PCLO	exonic	opensea	0.116586	0.0384914	Hypermethylated
cg15178744	chr1		IGR	CYP4X1(dist=28)	upstream	opensea	0.16051	0.0385011	Hypermethylated
cg14118616	chr11		IGR	MIR3166(dist=55504),CTSC(dist=61495)	intergenic	opensea	0.125773	0.0386299	Hypermethylated
cg13792279	chr21	CLDN17	1stExon	CLDN17	exonic	opensea	0.103664	0.0386435	Hypermethylated
cg23323906	chr16		IGR	MIR4719(dist=141564),MON1B(dist=180607)	intergenic	opensea	0.105739	0.0388021	Hypermethylated
cg14764203	chr19		IGR	SEMA6B(dist=16273),TNFAIP8L1(dist=63559)	intergenic	opensea	0.280254	0.0389171	Hypermethylated
cg18844229	chr14		IGR	BMP4(dist=10954),CDKN3(dist=429023)	intergenic	S_Shelf	0.167382	0.0389253	Hypermethylated
cg17775994	chr20		IGR	BTBD3(dist=430824),LINC01722(dist=507785)	intergenic	opensea	0.101302	0.0390692	Hypermethylated
cg18005597	chr5		IGR	LINC02112(dist=294796),ATPSCKMT(dist=26888)	intergenic	opensea	0.131264	0.0393992	Hypermethylated
cg05400002	chr3		IGR	SPATA16(dist=12457),NLGN1(dist=242260)	intergenic	opensea	0.110481	0.0394805	Hypermethylated
cg11993171	chr19	CATSPERG	Body	CATSPERG	intronic	S_Shore	0.104988	0.0396497	Hypermethylated
cg03558025	chr3		IGR	NAALADL2(dist=509573),MIR7977(dist=194982)	intergenic	opensea	0.110036	0.0397715	Hypermethylated
cg04332927	chr6		IGR	LOC101929705	ncRNA_intronic	N_Shore	-0.109929	0.0398877	Hypomethylated
cg18034092	chr3	ANO10	Body	ANO10	intronic	opensea	0.136983	0.0399	Hypermethylated
cg03860982	chr16	IFT140	Body	IFT140	intronic	opensea	0.336794	0.0399207	Hypermethylated
cg13937208	chr13	EDNRB	TSS1500	EDNRB(dist=1416),LINC01069(dist=2823)	intergenic	opensea	0.109905	0.0399504	Hypermethylated
cg17440933	chr5	TSSK1B	3'UTR	TSSK1B	UTR3	opensea	0.133029	0.0400431	Hypermethylated
cg16963484	chr11	OR5F1	TSS1500	OR5F1(dist=1115),OR5AS1(dist=34679)	intergenic	opensea	0.138076	0.0401043	Hypermethylated
cg18067840	chr6	BTNL2	TSS1500	BTNL2(dist=166);TSBP1-AS1(dist=166)	upstream;downstream	opensea	0.126286	0.0401529	Hypermethylated
cg11966432	chr8	DLGAP2	Body	DLGAP2	intronic	Island	0.114489	0.0401587	Hypermethylated
cg02514003	chr2		IGR	SNTG2(dist=6651),TPO(dist=39198)	intergenic	opensea	0.138347	0.0402287	Hypermethylated
cg23026106	chr13	FAM155A	Body	FAM155A-IT1	ncRNA_intronic	opensea	0.204495	0.0402765	Hypermethylated
cg02815786	chr1		IGR	RNU1-1,RNU1-2,RNU1-3,RNU1-4,RNVU1-18(dist=36)	upstream	Island	0.105856	0.0403709	Hypermethylated
cg01267532	chr18		IGR	LINC01029(dist=560689),SALL3(dist=473903)	intergenic	Island	0.110994	0.0405922	Hypermethylated
cg18933620	chr18		IGR	LOC284241	ncRNA_intronic	Island	-0.144916	0.0406274	Hypomethylated
cg26620655	chr7	C7orf50	Body	C7orf50	intronic	opensea	0.2087	0.0407834	Hypermethylated
cg03130530	chr2		IGR	LINC01247(dist=118988),LINC01246(dist=131699)	intergenic	N_Shore	0.121247	0.0408472	Hypermethylated
cg07749158	chr12		IGR	ALG10B(dist=63415),CPNE8(dist=259067)	intergenic	opensea	0.203881	0.040951	Hypermethylated
cg00545102	chr20	NINL	Body	NINL	exonic	opensea	0.115245	0.040954	Hypermethylated
cg11666770	chr19		IGR	ERFL	intronic	N_Shore	0.123413	0.0409996	Hypermethylated
cg03738707	chr2		IGR	LIMS2(dist=13975),WDR33(dist=5270)	intergenic	Island	0.128414	0.0410854	Hypermethylated
cg11810736	chr12	OR10A7	1stExon	OR10A7	exonic	opensea	0.212547	0.0411606	Hypermethylated
cg25247692	chr10	UBTD1	Body	UBTD1	intronic	opensea	0.107201	0.0412386	Hypermethylated
cg19542131	chr5	TSSK1B	1stExon	TSSK1B	UTR3	opensea	0.167177	0.041262	Hypermethylated
cg24966285	chr10		IGR	LINC01375(dist=169500),LINC02653(dist=275648)	intergenic	opensea	0.140425	0.0413811	Hypermethylated
cg00973118	chr16	AXIN1	Body	AXIN1	intronic	N_Shore	0.154254	0.0414366	Hypermethylated
cg14537856	chr12	CHST11	Body	CHST11	exonic	Island	0.117982	0.0416915	Hypermethylated
cg15439546	chr1		IGR	KAZN-AS1	ncRNA_intronic	opensea	0.115312	0.0417988	Hypermethylated
cg27399031	chr4		IGR	LINC02616(dist=201750),MIR4801(dist=19454)	intergenic	opensea	0.104323	0.0419254	Hypermethylated
cg04340502	chr6	GSTA3	TSS1500	GSTA3(dist=713)	upstream	opensea	0.110002	0.041987	Hypermethylated
cg16241550	chr11		IGR	LINC02731(dist=6484),JAM3(dist=21100)	intergenic	opensea	-0.112071	0.042096	Hypomethylated
cg24326782	chr8		IGR	LOC102724804(dist=102805),SDC2(dist=3570)	intergenic	N_Shelf	0.133685	0.0421548	Hypermethylated
cg26791307	chr15		IGR	SPATA8(dist=300390),LINC02254(dist=284366)	intergenic	opensea	0.138702	0.0421947	Hypermethylated
cg17549590	chr3		IGR	GRM7(dist=136971),LOC101927394(dist=74301)	intergenic	opensea	0.13134	0.0422316	Hypermethylated
cg19122579	chr6	ZDHHC14	Body	ZDHHC14	intronic	opensea	0.129315	0.0423648	Hypermethylated
cg02266339	chr3	GP5	TSS1500	GP5(dist=1186),ATP13A3(dist=2222)	intergenic	S_Shelf	0.105823	0.0425368	Hypermethylated
cg25126021	chr6	KIAA1244	Body	ARFGEF3	intronic	Island	0.103779	0.0425508	Hypermethylated
cg08715430	chr10		IGR	MGMT(dist=7649),EBF3(dist=56601)	intergenic	N_Shore	0.126057	0.0427251	Hypermethylated
cg06234511	chr12		IGR	TMTC2(dist=424797),SLC6A15(dist=1299829)	intergenic	opensea	0.203626	0.0427507	Hypermethylated
cg12529671	chr12	CHST11	Body	CHST11	exonic	S_Shore	0.157504	0.0427771	Hypermethylated
cg24603113	chr7	C7orf50	Body	C7orf50	intronic	Island	0.122456	0.0428752	Hypermethylated
cg20697702	chr4		IGR	INPP4B(dist=238843),LOC105377623(dist=92282)	intergenic	opensea	0.13357	0.04292	Hypermethylated
cg10832941	chr15		IGR	C15orf32(dist=32418),LINC00930(dist=34283)	intergenic	opensea	0.100293	0.0431063	Hypermethylated
cg21752758	chr8	KCNB2	Body	KCNB2	exonic	opensea	0.10489	0.0431556	Hypermethylated
cg15591699	chr2	RGPD3	Body	RGPD3	exonic	opensea	-0.104059	0.0431923	Hypomethylated
cg11751808	chr6		IGR	LOC101928516	ncRNA_intronic	opensea	0.160952	0.0432803	Hypermethylated
cg24024903	chr10		IGR	DIP2C(dist=95081),LARP4B(dist=22165)	intergenic	opensea	0.159431	0.043495	Hypermethylated
cg12852132	chr4		IGR	GBA3(dist=915466),PPARGC1A(dist=56983)	intergenic	opensea	0.10428	0.0435369	Hypermethylated
cg20170028	chr11	SHANK2	5'UTR	SHANK2	intronic	opensea	0.115564	0.0436538	Hypermethylated
cg13310895	chr1	LOC101928241	Body	LINC01787	ncRNA_intronic	opensea	0.138426	0.0436603	Hypermethylated
cg15590056	chr7		IGR	ACTR3C	intronic	opensea	0.113819	0.0437472	Hypermethylated
cg03155345	chr4		IGR	HS3ST1(dist=211892),LINC02360(dist=100165)	intergenic	opensea	0.133757	0.0437831	Hypermethylated
cg08641561	chr1	VANGL2	Body	VANGL2	exonic	Island	0.102978	0.0438308	Hypermethylated
cg00566961	chr5		IGR	FAM170A(dist=516914),PRR16(dist=311542)	intergenic	opensea	0.117648	0.0438684	Hypermethylated
cg19831967	chr2		IGR	LINC01865	ncRNA_exonic	S_Shelf	0.118181	0.0439056	Hypermethylated
cg16874861	chr18	MTCL1	Body	MTCL1	intronic	S_Shore	0.142056	0.0439101	Hypermethylated
cg21584979	chr2	SH3BP4	5'UTR	SH3BP4	intronic	opensea	0.127495	0.0439289	Hypermethylated
cg03233918	chr4		IGR	LOC101928978	ncRNA_intronic	opensea	0.125786	0.0441571	Hypermethylated
cg23531150	chr3		IGR	XYLB	UTR3	opensea	0.102219	0.0441763	Hypermethylated
cg14925328	chr2		IGR	CPO(dist=79520),KLF7(dist=25144)	intergenic	opensea	0.119448	0.0442292	Hypermethylated
cg15679417	chr1	USH2A	Body	USH2A	intronic	opensea	0.108928	0.0442334	Hypermethylated
cg13280036	chr6		IGR	BCKDHB(dist=575944),TENT5A(dist=823516)	intergenic	opensea	0.157571	0.0442685	Hypermethylated
cg10631933	chr8	VPS13B	Body	VPS13B	intronic	opensea	0.147389	0.0443186	Hypermethylated
cg09689633	chr16		IGR	LINC02130	ncRNA_intronic	opensea	0.182836	0.0443632	Hypermethylated
cg16538343	chr11	MRGPRF	Body	MRGPRF	exonic	Island	0.102122	0.0444637	Hypermethylated
cg27207597	chr16	RAB11FIP3	Body	RAB11FIP3	intronic	opensea	0.126032	0.0445478	Hypermethylated
cg01267373	chr18		IGR	LOC284241	ncRNA_intronic	Island	-0.173115	0.044591	Hypomethylated
cg09964194	chr2		IGR	DPP10(dist=1785510),DDX18(dist=183403)	intergenic	opensea	0.129646	0.0446053	Hypermethylated
cg26148471	chr11	OR5AS1	TSS1500	OR5AS1(dist=267)	upstream	opensea	0.101204	0.0446585	Hypermethylated
cg11371847	chr3		IGR	LINCR-0002(dist=51782),FGF12(dist=497253)	intergenic	opensea	0.109378	0.0446744	Hypermethylated
cg02975386	chr2		IGR	LINC01941(dist=127149),GYPC(dist=410800)	intergenic	opensea	-0.131061	0.0446755	Hypomethylated
cg23624636	chr3		IGR	EPHA3(dist=610098),NONE(dist=NONE)	intergenic	opensea	0.125204	0.044722	Hypermethylated
cg06769560	chr5		IGR	LINC01848(dist=403825),TMEM232(dist=130768)	intergenic	opensea	0.106398	0.0448431	Hypermethylated
cg08624093	chr1		IGR	TTC34(dist=16058),ACTRT2(dist=204540)	intergenic	opensea	0.11822	0.0448757	Hypermethylated
cg09644662	chr4	C4orf19	TSS1500	C4orf19	intronic	opensea	0.178152	0.0452155	Hypermethylated
cg14567043	chr12	LRTM2	Body	LRTM2	exonic	opensea	0.119152	0.0453217	Hypermethylated
cg05885355	chr5		IGR	KCTD16(dist=98626),PRELID2(dist=1172032)	intergenic	opensea	0.106268	0.0455808	Hypermethylated
cg10598433	chr10	EBF3	Body	EBF3	intronic	S_Shore	-0.174002	0.0456462	Hypomethylated
cg21844184	chr4		IGR	UGT2A3(dist=42183),UGT2B10(dist=10590)	intergenic	opensea	0.110731	0.045814	Hypermethylated
cg03476791	chr7		IGR	ATP5MF-PTCD1(dist=3372),ZNF789(dist=3351)	intergenic	N_Shelf	0.135723	0.0461619	Hypermethylated
cg15552103	chr14	ACOT2	TSS1500	HEATR4(dist=8688),ACOT2(dist=1424)	intergenic	N_Shore	-0.116007	0.0461819	Hypomethylated
cg07815878	chr4	STOX2	Body	STOX2	intronic	opensea	0.107743	0.0463787	Hypermethylated
cg19283150	chr3	KAT2B	Body	KAT2B	exonic	opensea	0.101327	0.0464637	Hypermethylated
cg23314508	chr5		IGR	LINC01340(dist=127498),LINC02234(dist=42209)	intergenic	opensea	0.100005	0.0465781	Hypermethylated
cg20765594	chr4		IGR	LINC02428(dist=108193),TACR3(dist=38112)	intergenic	opensea	0.118379	0.0465927	Hypermethylated
cg20521795	chr15		IGR	LINC02694(dist=313472),C15orf54(dist=237159)	intergenic	opensea	0.114946	0.0466573	Hypermethylated
cg10678801	chr5	SPINK7	3'UTR	LOC102546294	ncRNA_intronic	opensea	0.104691	0.0466898	Hypermethylated
cg10147298	chr12	SELPLG	Body	SELPLG	exonic	opensea	-0.128485	0.0467511	Hypomethylated
cg13049247	chr2	SNTG2	Body	SNTG2	exonic	opensea	0.108116	0.0468588	Hypermethylated
cg07508332	chr17	SLC16A3	TSS1500	SLC16A3(dist=716)	upstream	N_Shore	0.133602	0.0468992	Hypermethylated
cg17833954	chr5	TRPC7	Body	TRPC7-AS2	ncRNA_intronic	opensea	-0.100655	0.0470709	Hypomethylated
cg10350607	chr8		IGR	LOC101927815(dist=155034),CSMD1(dist=51858)	intergenic	opensea	-0.158436	0.0471063	Hypomethylated
cg16696848	chr8		IGR	EPHX2(dist=49463),CLU(dist=1890)	intergenic	S_Shelf	-0.104075	0.0472906	Hypomethylated
cg02505331	chr4		IGR	UNC5C(dist=90312),PDHA2(dist=200808)	intergenic	opensea	-0.109658	0.0473979	Hypomethylated
cg05183671	chr12		IGR	LOC440084	ncRNA_intronic	opensea	0.110266	0.0475763	Hypermethylated
cg20060672	chr14		IGR	CTSG(dist=19346),GZMH(dist=10884)	intergenic	opensea	0.102401	0.0476028	Hypermethylated
cg17390890	chr12		IGR	LINC02444(dist=842148),LOC100507377(dist=82711)	intergenic	opensea	0.101515	0.0479613	Hypermethylated
cg16363417	chr14		IGR	LINC02324(dist=60199),MIR4708(dist=52572)	intergenic	S_Shelf	-0.101694	0.0479902	Hypomethylated
cg23377495	chr4		IGR	H2AZ1-DT(dist=4361),DDIT4L(dist=143804)	intergenic	opensea	0.133048	0.0480938	Hypermethylated
cg01559641	chr10		IGR	AKR1C3(dist=40945),AKR1C8P(dist=5832)	intergenic	opensea	0.143283	0.0480982	Hypermethylated
cg17435902	chr1		IGR	SCCPDH(dist=7939),LINC01341(dist=13541)	intergenic	opensea	0.119517	0.048168	Hypermethylated
cg08421768	chr4	FGF2	Body	FGF2	intronic	opensea	0.19161	0.048238	Hypermethylated
cg18186327	chr1		IGR	LINC01343(dist=208350),LINC01685(dist=52079)	intergenic	opensea	0.113872	0.0482442	Hypermethylated
cg25412357	chr13		IGR	LINC02337(dist=218036),LINC00354(dist=35230)	intergenic	opensea	0.115361	0.0483884	Hypermethylated
cg13559820	chr9	GLT6D1	Body	GLT6D1	intronic	opensea	0.17463	0.0484174	Hypermethylated
cg17088428	chr12	MUCL1	Body	MUCL1	intronic	opensea	0.188242	0.0484507	Hypermethylated
cg19710271	chr2		IGR	CUL3(dist=81877),DOCK10(dist=97816)	intergenic	opensea	-0.114241	0.0484643	Hypomethylated
cg02405016	chr4	STPG2	Body	STPG2	intronic	opensea	0.166135	0.0484652	Hypermethylated
cg08926977	chr8		IGR	XKR9(dist=45923),EYA1(dist=415568)	intergenic	opensea	0.193602	0.0485587	Hypermethylated
cg12471375	chr7	AUTS2	Body	AUTS2	intronic	opensea	0.139288	0.0485825	Hypermethylated
cg02537883	chr12		IGR	SKP1P2(dist=17062),LINC02378(dist=574133)	intergenic	opensea	-0.123889	0.0485827	Hypomethylated
cg24140586	chr10	CYP2C9	TSS1500	CYP2C9(dist=979)	upstream	opensea	0.133872	0.0487294	Hypermethylated
cg09141856	chr16		IGR	EEF2KMT(dist=350406),LINC01570(dist=152943)	intergenic	opensea	0.12221	0.048744	Hypermethylated
cg24489062	chr6		IGR	STX7	UTR3	opensea	0.101401	0.0487694	Hypermethylated
cg24343720	chr21	CLDN17	TSS200	CLDN17	UTR5	opensea	0.104754	0.0487911	Hypermethylated
cg14068301	chr10	PFKP	Body	PFKP	intronic	Island	0.137596	0.0491294	Hypermethylated
cg05635940	chr19	LGI4	Body	LGI4	exonic	Island	0.134939	0.0491398	Hypermethylated
cg01854967	chr2		IGR	LINC01115	ncRNA_exonic	Island	-0.122663	0.0491544	Hypomethylated
cg00789652	chr11		IGR	C11orf74(dist=705644),LINC02760(dist=573666)	intergenic	opensea	0.146542	0.049196	Hypermethylated
cg14742352	chr2		IGR	LOC730100	ncRNA_intronic	opensea	0.149245	0.0493726	Hypermethylated
cg13569765	chr11		IGR	TIGD3(dist=16437),SLC25A45(dist=1144)	intergenic	opensea	0.159577	0.0493737	Hypermethylated
cg19214408	chr10	MXI1	Body	MXI1	intronic	N_Shelf	0.102509	0.0496626	Hypermethylated
cg24054416	chr5		IGR	FAM174A(dist=211148),ST8SIA4(dist=9045)	intergenic	opensea	0.123564	0.0497251	Hypermethylated
cg19015080	chr11		IGR	TMEM135(dist=276363),LINC02711(dist=113017)	intergenic	opensea	0.109117	0.0497253	Hypermethylated
cg23468088	chr8	FOXH1	1stExon	FOXH1(dist=13)	upstream	N_Shore	0.150864	0.0497805	Hypermethylated
cg08348387	chr2	ANO7	Body	ANO7	intronic	S_Shore	-0.100008	0.0497997	Hypomethylated
cg15570860	chr11	TMEM9B	TSS1500	TMEM9B-AS1	ncRNA_intronic	S_Shore	-0.358059	0.0499467	Hypomethylated
