# Supplementary material for: Comprehensive DNA methylation profiling of sperm in male partners of couples with unexplained recurrent pregnancy loss
Source: Research Square preprint supplement (doi:10.21203/rs.3.rs-6835526/v1), 2025-07-02
Supplement: Supplementary file 2 [file c7aaf8b3a1c16a39057dd263.docx]

**Figure S1 The distribution features of all hypermethylated and hypomethylated probes marked by CpG island regions.**

**Figure S2 The distribution features of all hypermethylated and hypomethylated probes marked by genomic positions.**
