# Supplementary material for: Comprehensive DNA methylation profiling of sperm in male partners of couples with unexplained recurrent pregnancy loss
Source: Research Square preprint supplement (doi:10.21203/rs.3.rs-6835526/v1), 2025-07-02
Supplement: Supplementary file 3 [file f60ae7dc26d6fd6c9b3b41e4.xlsx]

## Sheet: Table 1
Table 1 The ROC analysis of cg17985533 and region chr11:1997780-1997899.
	AUC	AUC_CI 95	threshold	specificity	sensitivity	accuracy
cg17985533	0.7838	0.6342 - 0.9333	0.5035	0.8	0.8	0.8
chr11:1997780-1997899	0.8125	0.6763 - 0.9487	0.4582	0.75	0.8	0.775
